# Supplementary material for: Gut microbiota composition correlates with diet and health in the elderly
Source: Springer Nature journal article supplement (doi:10.1038/nature11319), 2012-07-13
Supplement: 41586_2012_BFnature11319_MOESM298_ESM.pdf [file 41586_2012_BFnature11319_MOESM298_ESM.pdf]

## Supplementary Figures

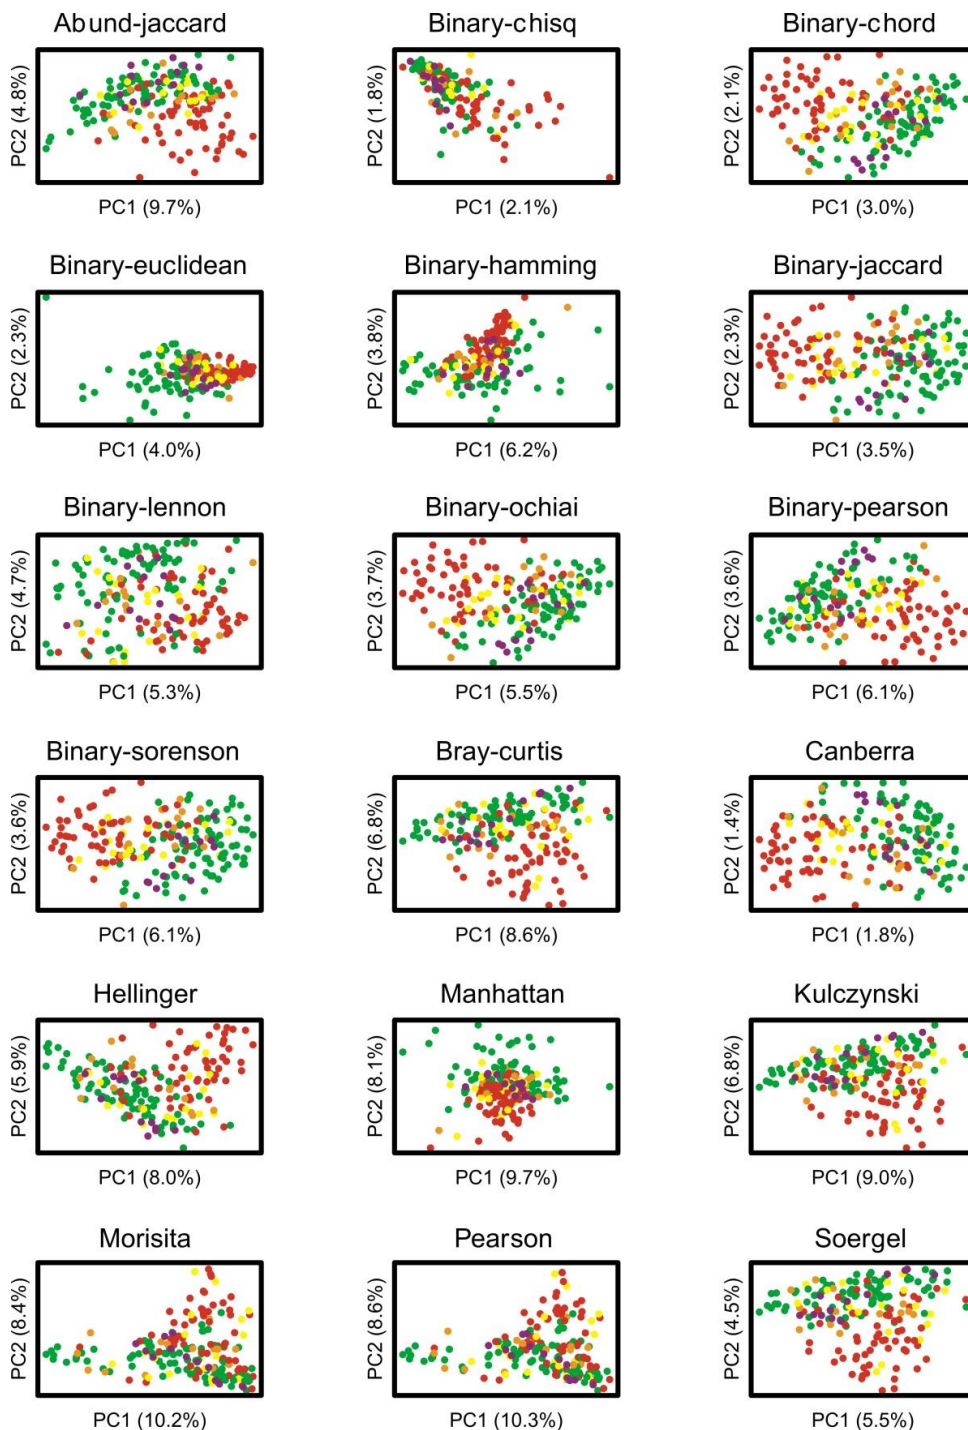

**Figure 1 | Principal Co-ordinate Analysis based on 18 different non-UniFrac beta-diversity distances.**

Subjects are colour coded according to community setting; Community (green), Day Hospital (yellow), Rehabilitation (orange), Long-stay (red), and Young healthy control subjects (purple).

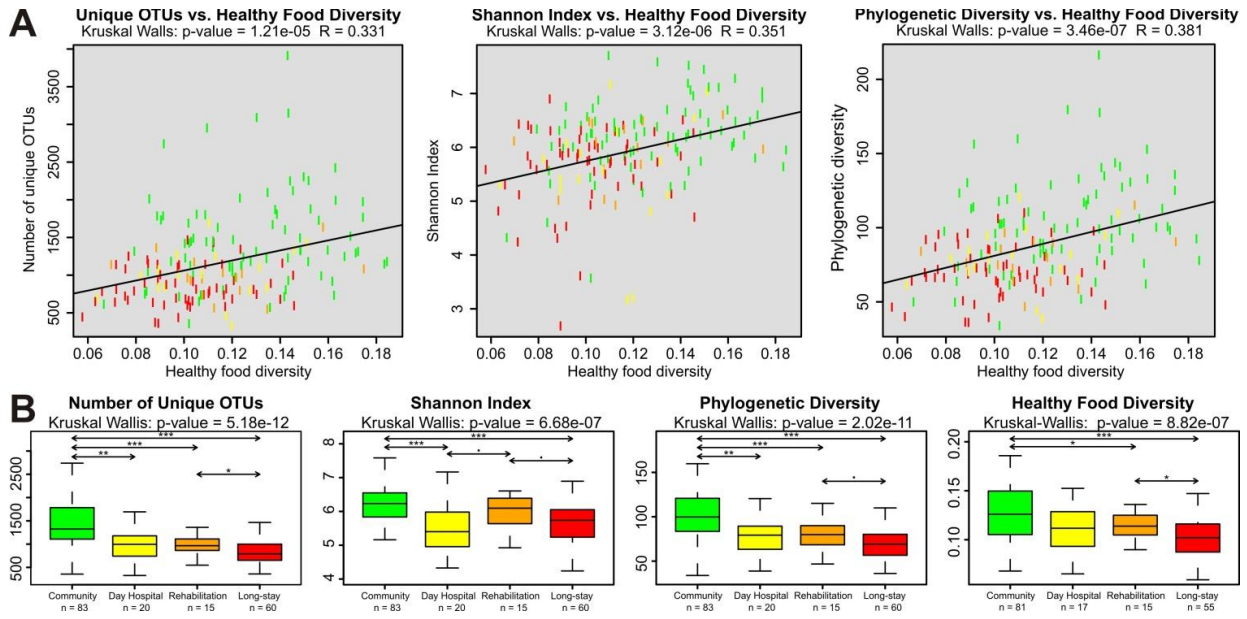

**Figure 2 | Correlations between healthy food diversity and microbiota diversity.**

A). Pearson correlations and linear regression of Healthy Food Diversity and three microbiota diversity metrics, for the 168 subjects where dietary information was available. Subjects were colour coded as in Figure 1.  
 B). Comparison of three microbiota indices and the healthy food diversity index across the four community locations. Kruskal-Wallis P-values refer to tests performed across all four community locations; Mann-Whitney tests were performed for each pair-wise comparison. Subjects were colour coded as in Figure 1.

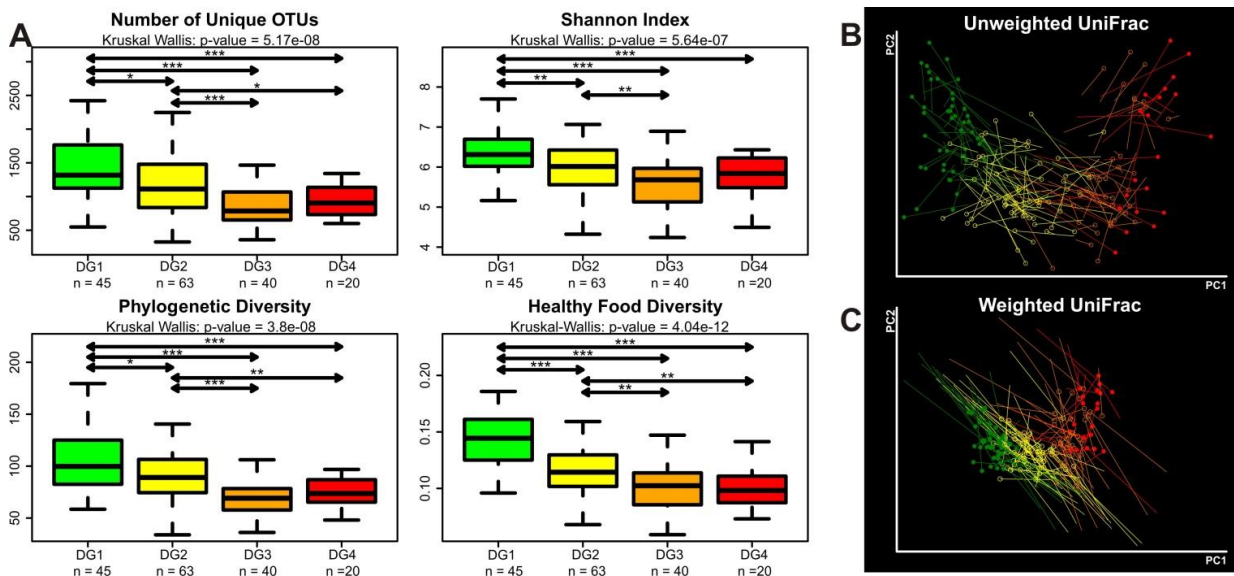

**Figure 3 | Microbiota diversity and healthy food diversity correlations**

A) Comparison of three microbiota and one healthy food diversity indices across the four dietary groups. B) Procrustes plots of unweighted and C) weighted UniFrac PCoA analysis of microbiota combined with FFQ PCA. The subjects in all panels are colour coded according to diet groups; DG1 (green closed circles), DG2 (yellow open circles), DG3 (orange open circles), and DG4 (red closed circles).

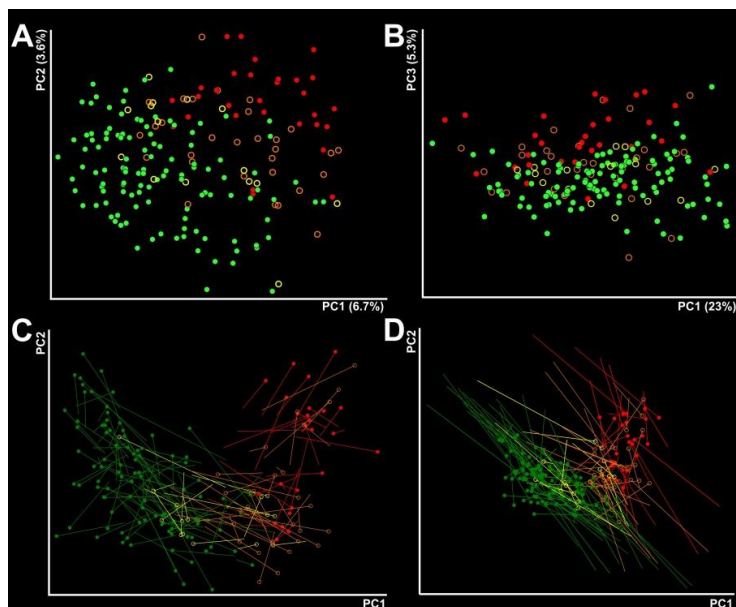

**Figure 4 | Duration in long-stay care affects microbiota**

A) Unweighted and B) weighted UniFrac PCoA of faecal microbiota from 191 subjects. Panels C and D show Procrustes analysis combining unweighted (C) and weighted (D) UniFrac PCoAs (non-circle end of lines) with Food Type PCA (circle-end of lines). The subjects are colour coded according to duration in long-stay care: N/A (community, day hospital and young healthy controls; green closed circles), less than six weeks (rehabilitation; yellow open circles), from six weeks to one year (long-stay; orange open circles), and longer than one year (long-stay; red closed circles).

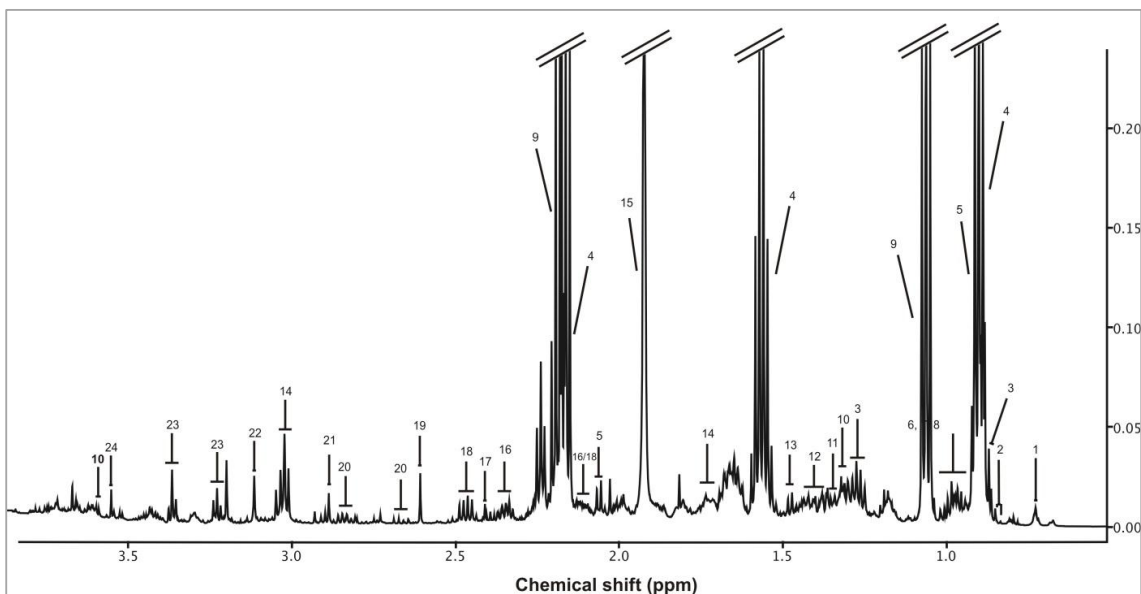

**Figure 5 | Representative <sup>1</sup>H NMR spectrum of a faecal water extract.**

Peaks are labelled to indicate a range of metabolites present in faecal water. The faecal sample was from from a subject in the community residence group. Peak identities: 1, cholate; 2, caprylate; 3, valerate; 4 butyrate; 5, isovalerate; 6, valine; 7, leucine; 8, isoleucine; 9, propionate; 10, threonine; 11, lactate; 12, isocaproate; 13, alanine; 14, lysine; 15, acetate; 16, glutamate; 17, succinate; 18, glutamine; 19, methylamine; 20, aspartate; 21, trimethylamine; 22, malonate; 23, taurine; 24, glycine.

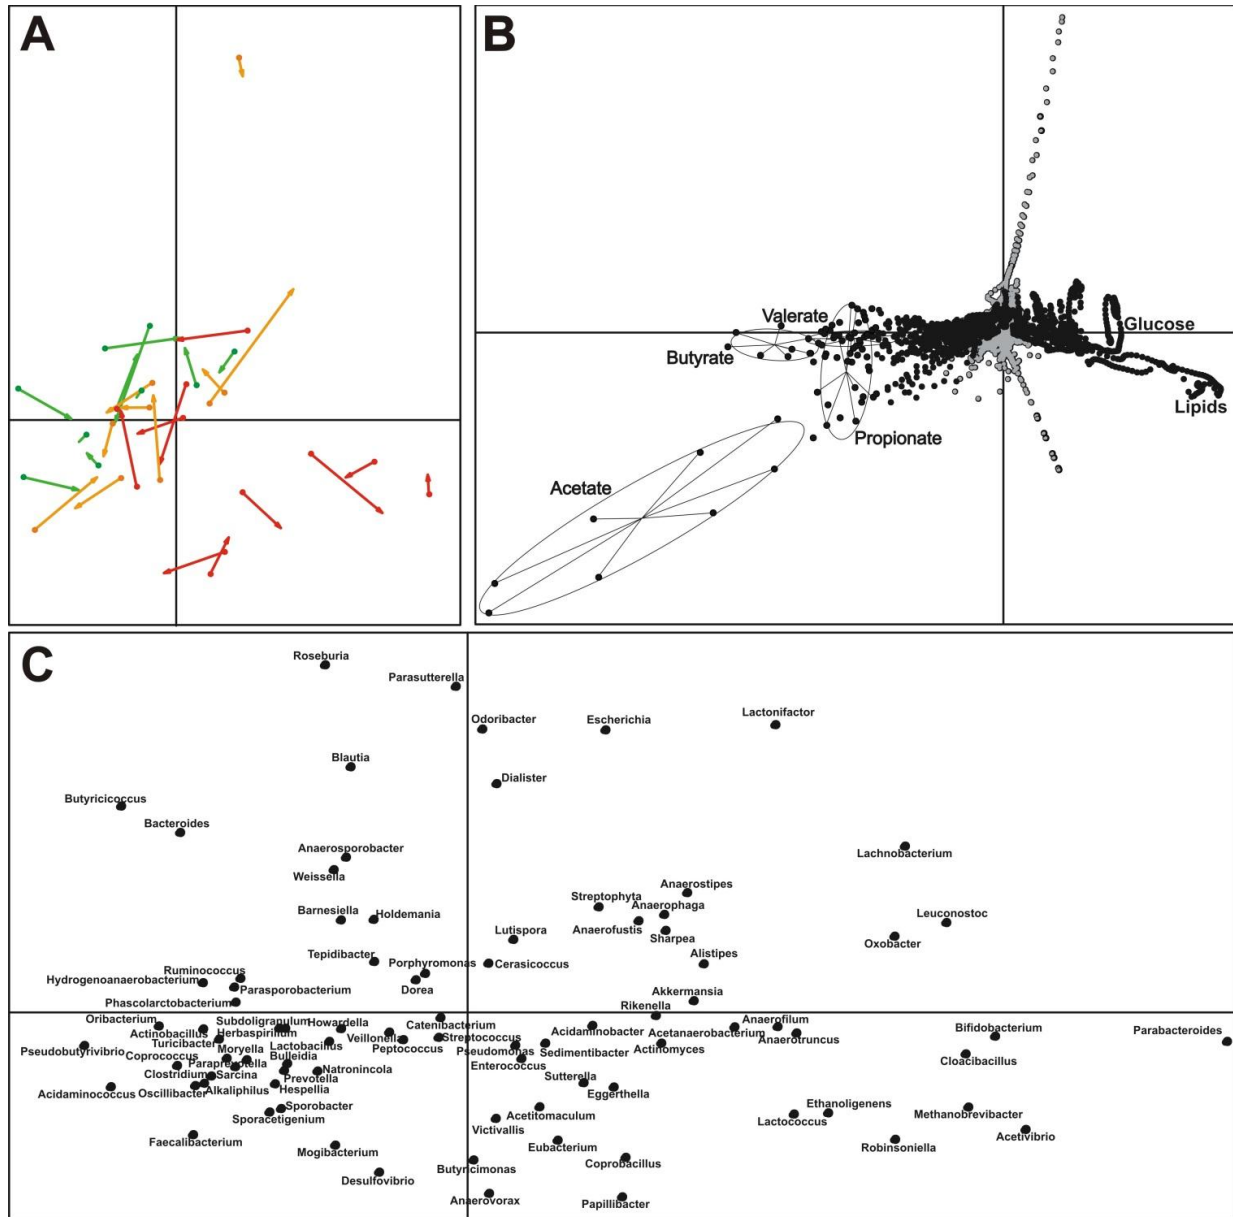

**Figure 6 | Co-inertia analysis (CIA) of relationships between metabolome, microbiota composition and residence location.**

The upper left panel shows the CIA of the metabolomics PCA and microbiota PCA, with arrows indicating where samples position in the metabolite dataset relative to the microbiota dataset. The upper right panel shows NMR loadings data; 95 % confidence intervals were calculated for individual loadings using jack-knife analysis<sup>56</sup>. Loadings that are significantly different from zero are presented in the plot as black dots with those that failed to show significance presented in grey. Relevant metabolites are labelled with dashed lines connecting NMR regions that represent the same metabolite. The lower panel displays the associated microbiota at genus level. Only genera present in at least 20% of the samples were used in the analysis.

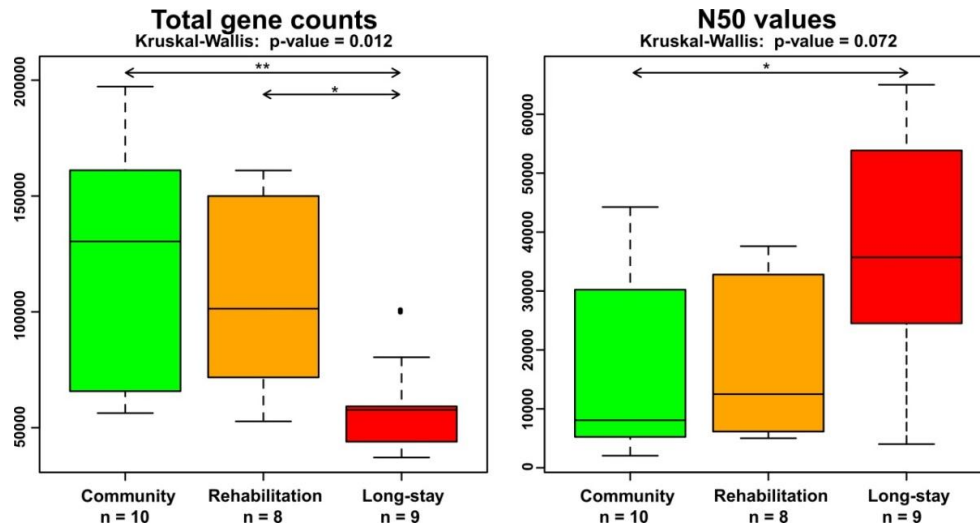

**Figure 7 | Predicted gene counts and assembly statistics for the faecal metagenome of 27 selected subjects.** The graphs show total gene counts and sequencing assembly N50 values for shotgun sequence data of the faecal metagenome for 27 subjects of indicated residence location.

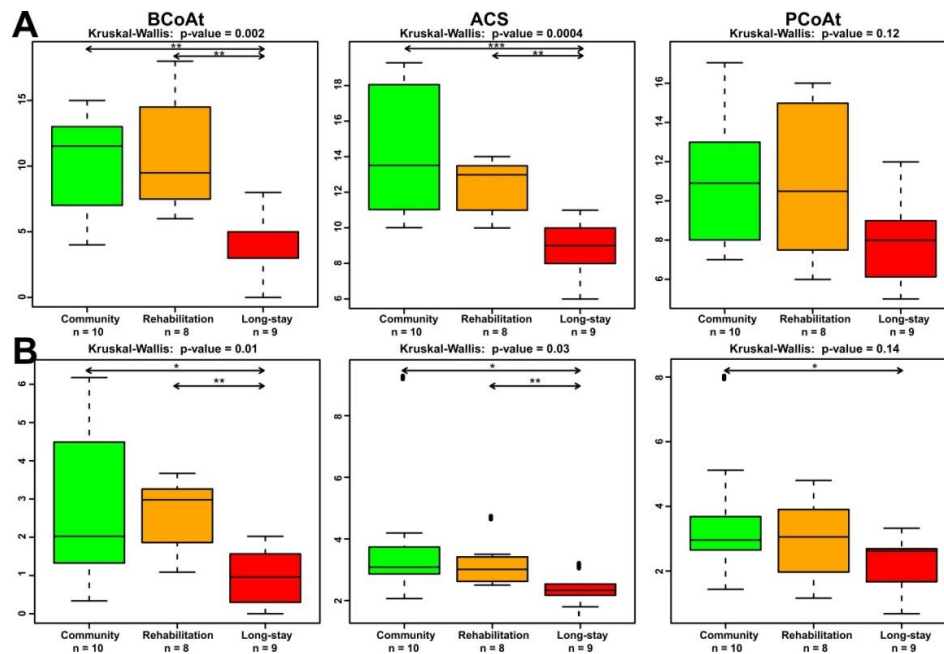

**Figure 8 | Frequency of genes relayed to butyrate, acetate and propionate production in the faecal metagenome of 27 subjects.**

Comparison of A) gene counts and B) average sequencing coverage, for enzymes involved in butyrate, acetate and propionate production. Gene count values were normalised for  $4.79 \times 10^9$  of sequenced bases per subject, and coverage values were normalised for the average coverage in each metagenome. BCoAt: Butyryl-CoA transferase/Acetyl-CoA hydrolase; ACS: Acetate-formyltetrahydrofolate synthetase/Formate-tetrahydrofolate ligase; PCoAt: Propionyl-CoA:succinate-CoA transferase/Propionate CoA-transferase.

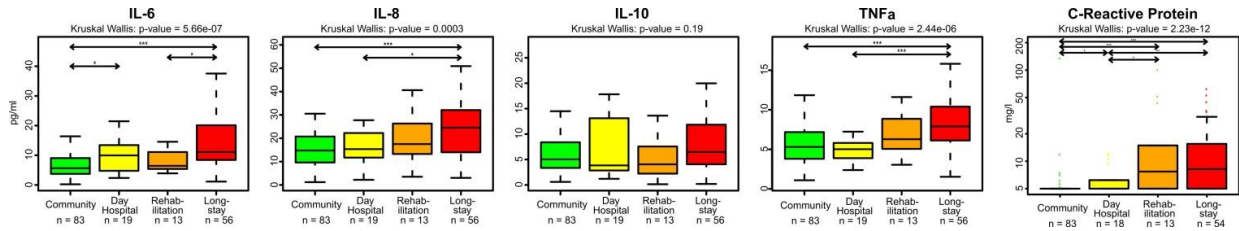

**Figure 9 | Cytokine and C Reactive Protein levels vary across subject residence location.**

Box plots are color coded by residence location according to the scheme in Figure 1. Kruskal-Wallis P-values refer to tests performed across all four community locations, and Mann-Whitney test was performed for each pair-wise comparison.

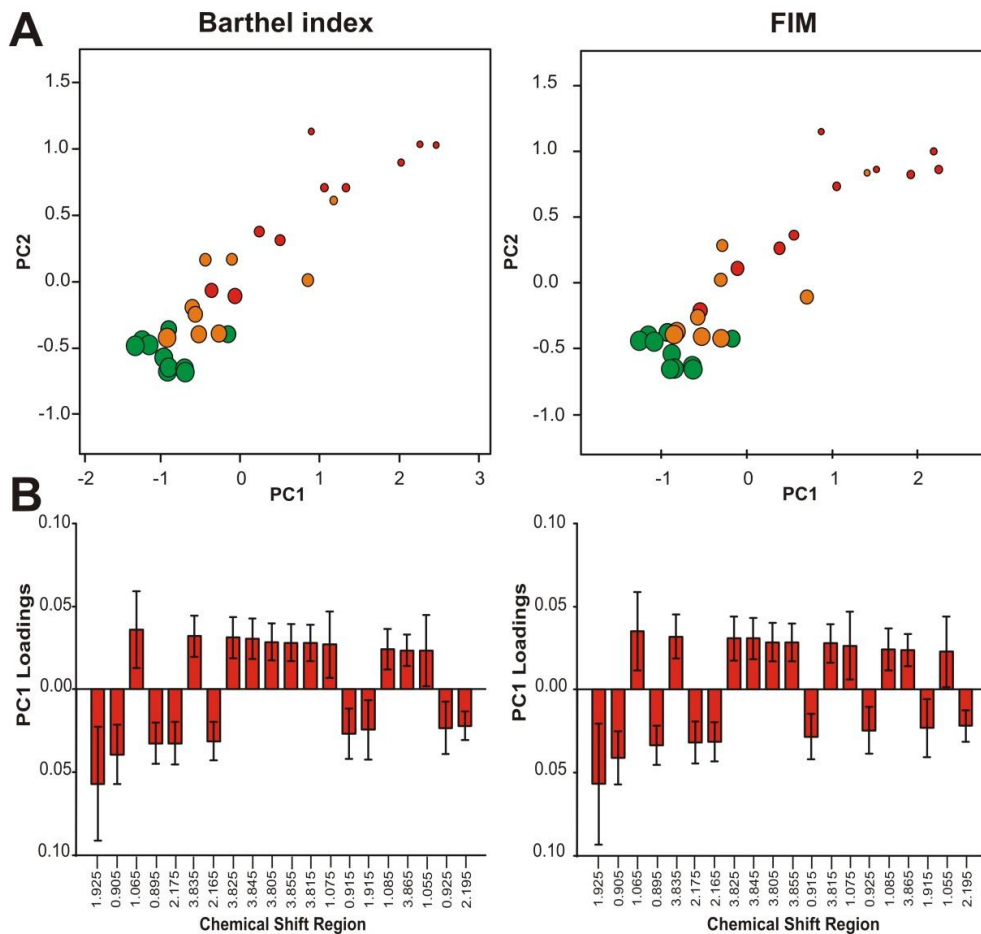

**Figure 10 | Correlation of faecal metabolome with indices of frailty.**

A. PCCA score plots derived from  $^1\text{H}$  NMR spectra of faecal water with FIM or Barthel index as covariate. Dot size reflects covariate value. The influence of the covariate was quantified by examining regression parameter estimates and the associated 95% CI. Barthel index has a significant effect on PC1 with an intercept of 1.62 (2.96, 0.28) (95% CI). FIM has a significant effect on PCI with an intercept of 1.58 (0.19, 2.96). Spectra from community ( $n=10$ ) are represented by green circles, rehabilitation ( $n=9$ ) are represented by orange circles and long-stay residents ( $n=10$ ) are represented by red circles. B. The top loadings for PC1 for each model. Acetate (1.925, 1.915 ppm), butyrate (0.905, 0.895, 0.915, 2.165 ppm) and propionate (2.175, 2.195 ppm) increase with increasing FIM and Barthel values. Error bars represent the 95% confidence intervals.

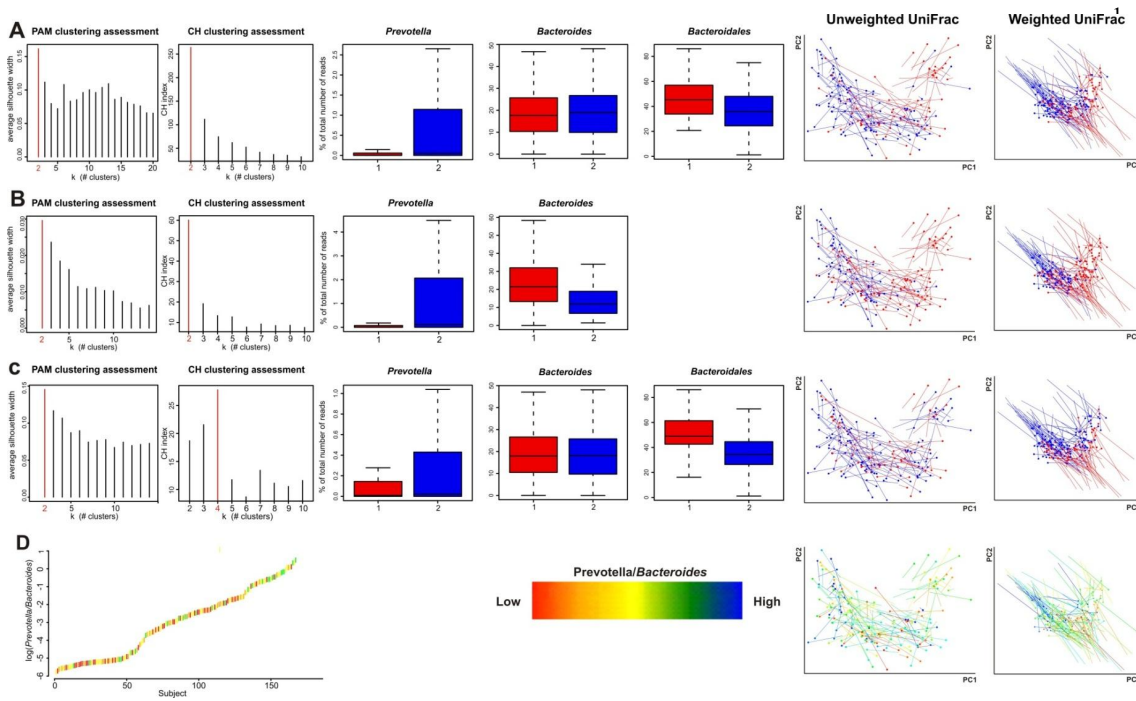

**Figure 11 | Enterotype definition is highly dependent on choice of clustering method.**

A) Enterotype clustering when based on Jensen-Shannon distances according to approach by Arumagam et al. 2010. B) Enterotype clustering when based on unweighted, and C) weighted UniFrac distances according to the approach by Wu et al. 2011. Abundances of *Prevotella* and *Bacteroides/Bacteroidales* in the two clusters were displayed as boxplots and in the unweighted UniFrac Procrustes plots to the right of figure. Clusters generated from the three methods were validated using both the silhouette technique (left bar chart) and the Calinski-Harabasz Index (right bar chart). D) In replacement of clustering approach, the *Prevotella/Bacteroides* ratio was ordered by size and subject colour-coded by residence location (left), and displayed as colour gradient in the Procrustes plots.

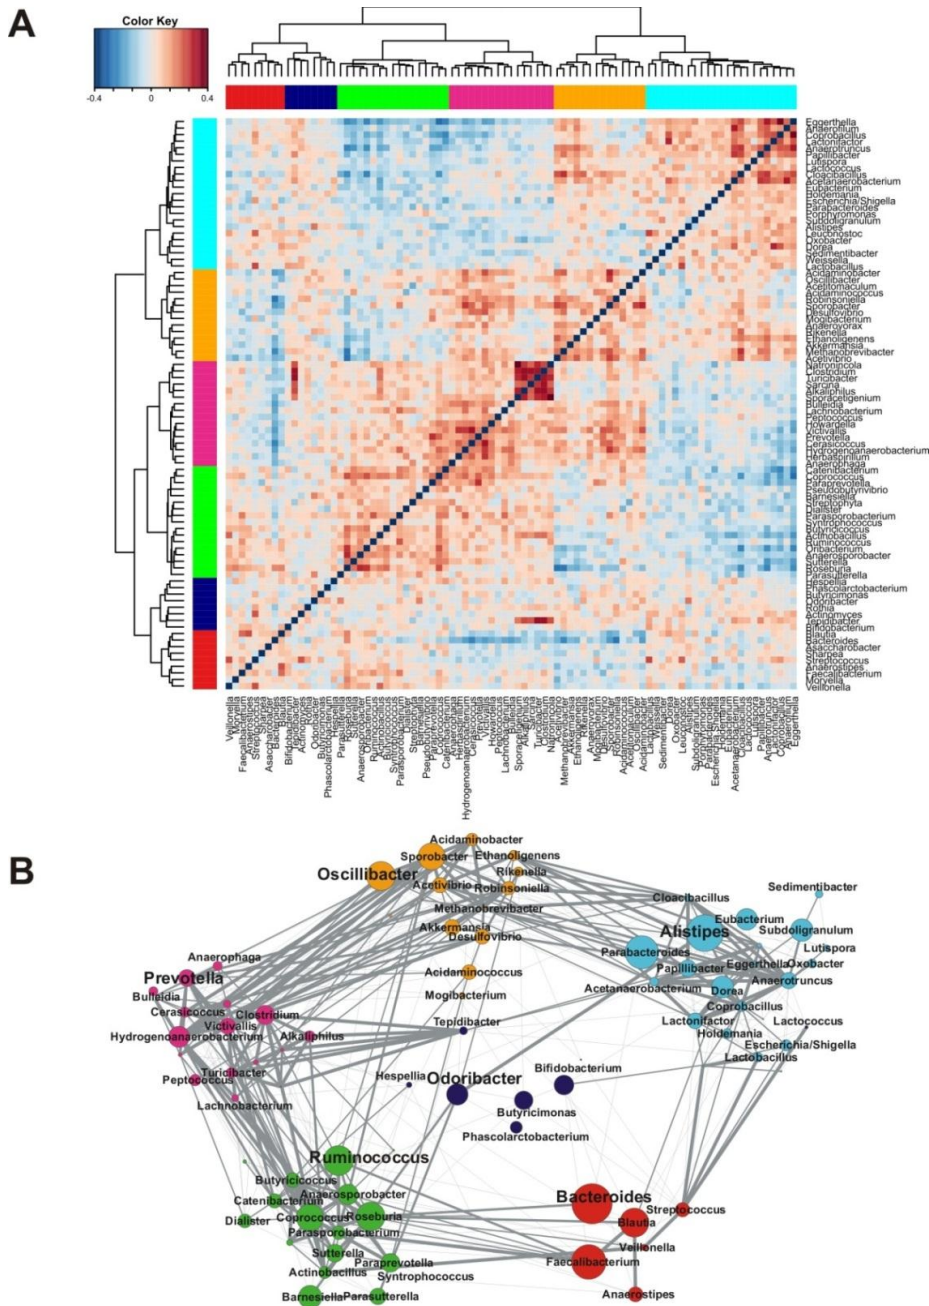

**Figure 12 | Definition of bacterial Co-abundance groups (CAGs)**

CAGs were defined by A) heat plot showing Kendall correlations between genera clustered by the Spearman correlation coefficient and Ward linkage hierarchical clustering; B) Network plot highlighting correlation relationships between five CAGs and a central group, for the whole cohort studied. Circle sizes indicate genus abundances. The thickness of the lines is proportional to correlation strength.



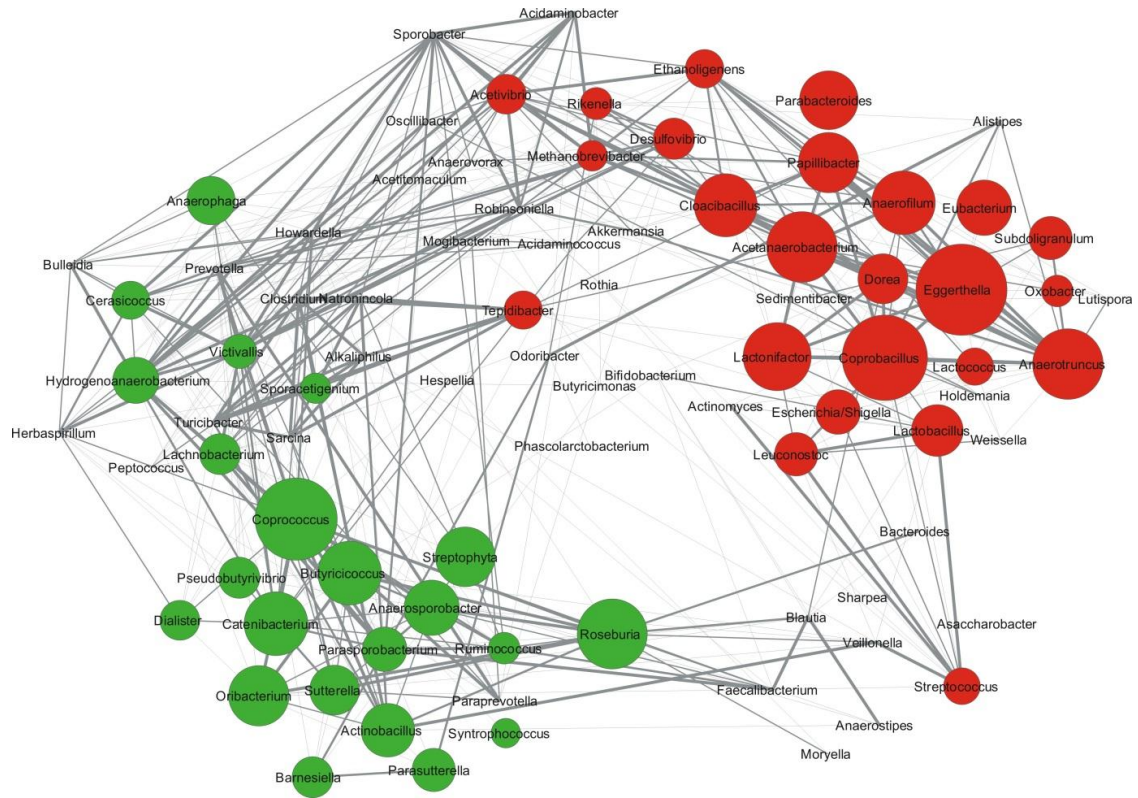

**Figure 13 | Genera that are significantly differentially abundant between Community (green) and Long-stay (red) subjects.**

Circle sizes indicate significant differential over-abundance in either of the two residence locations.

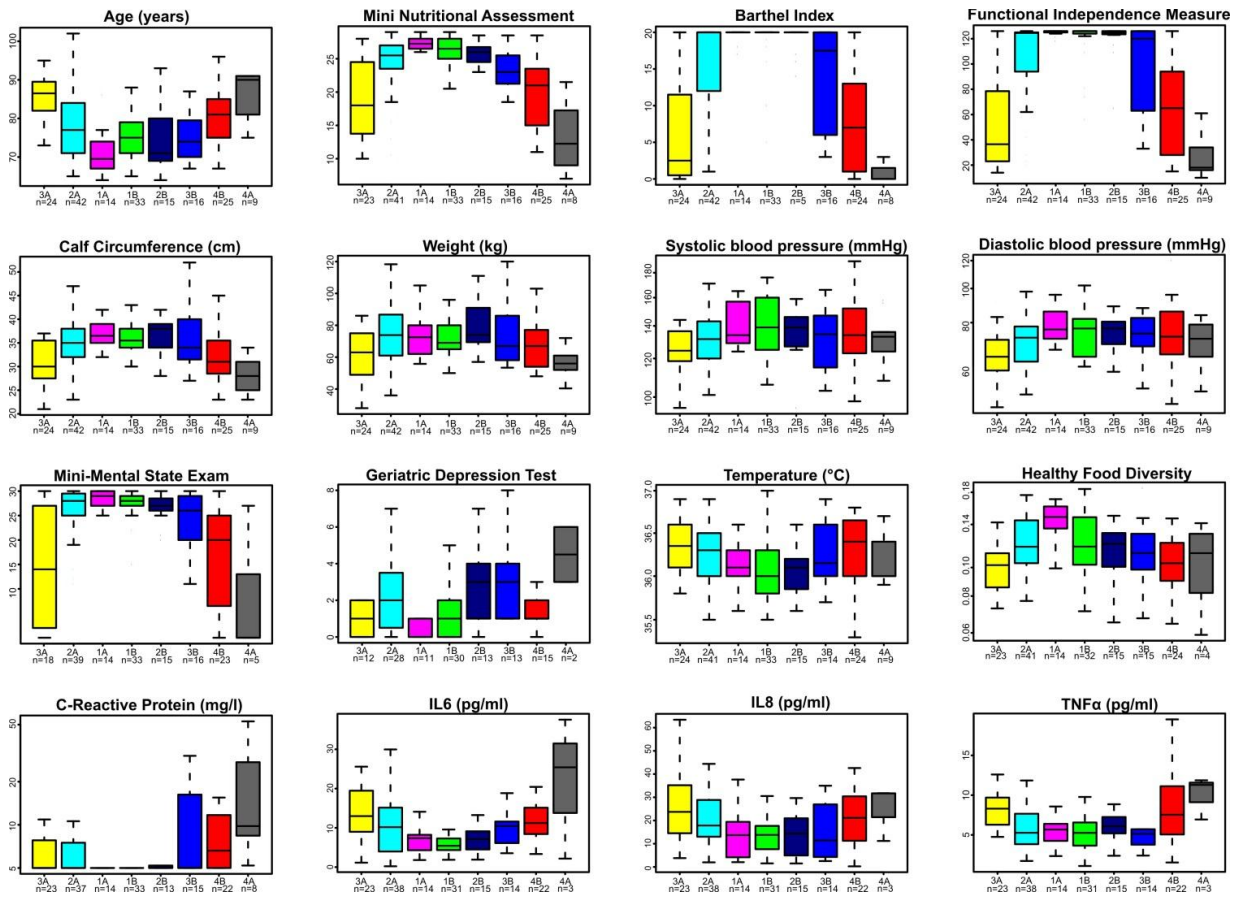

**Figure 14 | Relationship between the main eight microbiota groupings and health indicators.**

Box-plots showing health measures and indices, and food indices, as a function of main microbiota groupings 1a - 4b from UniFrac analysis in Fig.4.

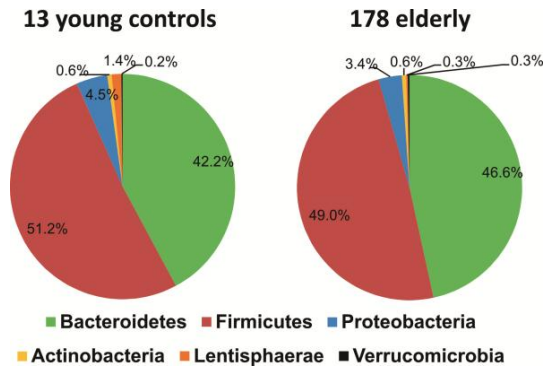

**Figure 15 | Aggregate reads classified at phylum level in faecal microbiota of young control and elderly subjects.**

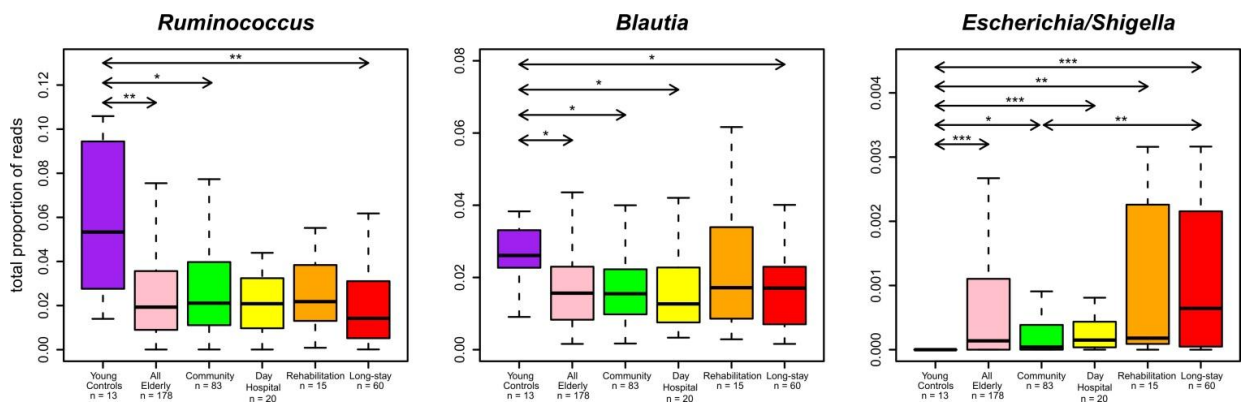

**Figure 16 | Major microbiota differences by community location.** The box-plots show significant genus-level differences between microbiota of young control subjects, the complete older person group studied here (all elderly), and cohorts defined by residence location.

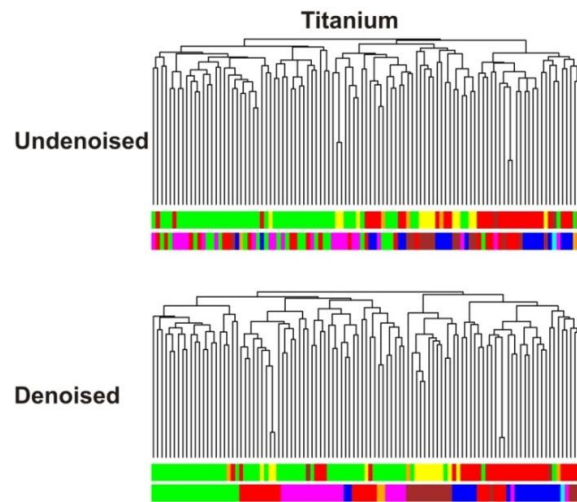

**Figure 17 | Hierarchical clustering of denoised and un-denoised OTUs, for both sequencing platforms, based on the Pearson correlation similarity metric and average linkage.** The top horizontal line for each heat map shows community location and the bottom line shows the different pyrosequencing runs with one colour each.

**Supplementary Tables****Table 1. Taxa that are found in 50% of the subjects, significantly different across the four community locations, according to a Kruskal-Wallis test, and that are more abundant in Community subjects relative to Long-stay subjects.**

C: Community subjects; DH: Day Hospital; R: Rehabilitation; LS: Long-stay. Community location columns show medians of percentages of RDP-classified reads over the total number of reads for each subject. The FDR value represents a Benjamini-Hochberg corrected P-value for the smaller data sets Clostridium cluster and Family, and a Q-value for the larger data sets Genus and Species.

|                                                                                               | <b>C</b> | <b>DH</b> | <b>R</b> | <b>LS</b> | <b>FDR</b> |
|-----------------------------------------------------------------------------------------------|----------|-----------|----------|-----------|------------|
| <b>Family</b>                                                                                 |          |           |          |           |            |
| <i>Lachnospiraceae</i><br>(Firmicutes/Clostridia/Clostridiales)                               | 10.50    | 8.94      | 11.19    | 5.95      | 7.1E-05    |
| <i>Pasteurellaceae</i><br>(Proteobacteria/Gammaproteobacteria/Pasteurellales)                 | 0.03     | 0.05      | 0.01     | 0.00      | 0.0025     |
| <i>Alcaligenaceae</i><br>(Proteobacteria/Betaproteobacteria/Burkholderiales)                  | 0.28     | 0.53      | 0.33     | 0.09      | 0.0034     |
| <b>Genus</b>                                                                                  |          |           |          |           |            |
| <i>Coproccoccus</i><br>(Firmicutes/Clostridia/Clostridiales/Lachnospiraceae)                  | 1.52     | 0.67      | 1.23     | 0.40      | 8.40E-08   |
| <i>Roseburia</i><br>(Firmicutes/Clostridia/Clostridiales/Lachnospiraceae)                     | 1.79     | 2.51      | 2.26     | 0.28      | 8.40E-07   |
| <i>Butyricoccus</i><br>(Firmicutes/Clostridia/Clostridiales/Ruminococcaceae)                  | 0.11     | 0.08      | 0.07     | 0.05      | 0.00002    |
| <i>Catenibacterium</i><br>(Firmicutes/Erysipelotrichi/Erysipelotrichales/Erysipelotrichaceae) | 0.06     | 0.02      | 0.00     | 0.00      | 0.00002    |
| <i>Oribacterium</i><br>(Firmicutes/Clostridia/Clostridiales/Lachnospiraceae)                  | 0.01     | 0.01      | 0.01     | 0.00      | 0.00006    |
| <i>Anaerospobacter</i><br>(Firmicutes/Clostridia/Clostridiales/Lachnospiraceae)               | 0.44     | 0.19      | 0.35     | 0.12      | 0.00018    |
| <i>Actinobacillus</i><br>(Proteobacteria/Gammaproteobacteria/Pasteurellales/Pasteurellaceae)  | 0.03     | 0.05      | 0.01     | 0.00      | 0.00018    |
| <i>Lachnobacterium</i><br>(Firmicutes/Clostridia/Clostridiales/Lachnospiraceae)               | 0.01     | 0.00      | 0.01     | 0.00      | 0.00027    |
| <i>Hydrogenoanaerobacterium</i><br>(Firmicutes/Clostridia/Clostridiales/Ruminococcaceae)      | 0.47     | 0.07      | 0.43     | 0.12      | 0.00057    |
| <i>Sutterella</i><br>(Proteobacteria/Betaproteobacteria/Burkholderiales/Alcaligenaceae)       | 0.09     | 0.11      | 0.06     | 0.00      | 0.00085    |
| <i>Parasutterella</i><br>(Proteobacteria/Betaproteobacteria/Burkholderiales/Alcaligenaceae)   | 0.08     | 0.06      | 0.05     | 0.01      | 0.0011     |
| <i>Parasporobacterium</i><br>(Firmicutes/Clostridia/Clostridiales/Lachnospiraceae)            | 0.08     | 0.04      | 0.06     | 0.02      | 0.0019     |
| <i>Barnesiella</i><br>(Bacteroidetes/Bacteroidia/Bacteroidales/Porphyromonadaceae)            | 0.48     | 0.44      | 0.67     | 0.11      | 0.0048     |

**Table 2. Taxa identified as per criteria in Supplementary Table 1 but showing taxa that are more abundant in Long-stay subjects relative to Community-dwelling subjects.**

|                                                                                                          | C    | DH   | R    | LS   | FDR     |
|----------------------------------------------------------------------------------------------------------|------|------|------|------|---------|
| <b>Family</b>                                                                                            |      |      |      |      |         |
| <i>Desulfovibrionaceae</i><br>(Proteobacteria/Deltaproteobacteria/Desulfovibrionales)                    | 0.01 | 0.01 | 0.02 | 0.09 | 5.8E-05 |
| <i>Lactobacillaceae</i><br>(Firmicutes/Bacilli/Lactobacillales)                                          | 0.00 | 0.01 | 0.15 | 0.02 | 7.1E-05 |
| <i>Eubacteriaceae</i><br>(Firmicutes/Clostridia/Clostridiales)                                           | 0.18 | 0.87 | 0.19 | 0.89 | 7.1E-05 |
| <i>Porphyromonadaceae</i><br>(Bacteroidetes/Bacteroidia/Bacteroidales)                                   | 4.41 | 7.20 | 5.57 | 8.53 | 0.00047 |
| <i>Enterobacteriaceae</i><br>(Proteobacteria/Gammaproteobacteria/Enterobacteriales)                      | 0.01 | 0.02 | 0.03 | 0.12 | 0.00059 |
| <i>Coriobacteriaceae</i><br>(Actinobacteria/Actinobacteria/Coriobacteriales)                             | 0.01 | 0.01 | 0.03 | 0.02 | 0.00087 |
| <i>Incertae Sedis XI</i><br>(Firmicutes/Clostridia/Clostridiales)                                        | 0.00 | 0.00 | 0.00 | 0.01 | 0.0054  |
| <i>Streptococcaceae</i><br>(Firmicutes/Bacilli/Lactobacillales)                                          | 0.05 | 0.09 | 0.11 | 0.10 | 0.042   |
| <b>Genus</b>                                                                                             |      |      |      |      |         |
| <i>Coprobacillus</i><br>(Firmicutes/Erysipelotrichi/Erysipelotrichales/Erysipelotrichaceae)              | 0.01 | 0.02 | 0.05 | 0.15 | 5.7E-09 |
| <i>Lactonifactor</i><br>(Firmicutes/Clostridia/Clostridiales/Ruminococcaceae)                            | 0.06 | 0.10 | 0.18 | 0.21 | 3.7E-07 |
| <i>Anaerotruncus</i><br>(Firmicutes/Clostridia/Clostridiales/Ruminococcaceae)                            | 0.09 | 0.08 | 0.12 | 0.26 | 4.3E-07 |
| <i>Acetanaerobacterium</i><br>(Firmicutes/Clostridia/Clostridiales/Ruminococcaceae)                      | 0.01 | 0.02 | 0.02 | 0.04 | 5.6E-07 |
| <i>Lactobacillus</i><br>(Firmicutes/Bacilli/Lactobacillales/Lactobacillaceae)                            | 0.00 | 0.01 | 0.15 | 0.02 | 3.9E-06 |
| <i>Anaerofilum</i><br>(Firmicutes/Clostridia/Clostridiales/Ruminococcaceae)                              | 0.00 | 0.00 | 0.00 | 0.01 | 7.8E-06 |
| <i>Eubacterium</i><br>(Firmicutes/Clostridia/Clostridiales/Eubacteriaceae)                               | 0.16 | 0.87 | 0.19 | 0.89 | 1.0E-05 |
| <i>Papillibacter</i><br>(Firmicutes/Clostridia/Clostridiales/Ruminococcaceae)                            | 0.11 | 0.11 | 0.10 | 0.38 | 0.00002 |
| <i>Parabacteroides</i><br>(Bacteroidetes/Bacteroidia/Bacteroidales/Porphyromonadaceae)                   | 2.56 | 4.18 | 4.20 | 5.86 | 0.00009 |
| <i>Acetivibrio</i><br>(Firmicutes/Clostridia/Clostridiales/Ruminococcaceae)                              | 0.04 | 0.01 | 0.01 | 0.11 | 0.00018 |
| <i>Ethanoligenens</i><br>(Firmicutes/Clostridia/Clostridiales/Ruminococcaceae)                           | 0.03 | 0.02 | 0.02 | 0.06 | 0.00038 |
| <i>Dorea</i><br>(Firmicutes/Clostridia/Clostridiales/Lachnospiraceae)                                    | 0.30 | 0.44 | 0.47 | 0.66 | 0.00055 |
| <i>Escherichia/Shigella</i><br>(Proteobacteria/Gammaproteobacteria/Enterobacteriales/Enterobacteriaceae) | 0.00 | 0.02 | 0.02 | 0.06 | 0.0012  |
| <i>Subdoligranulum</i><br>(Firmicutes/Clostridia/Clostridiales/Ruminococcaceae)                          | 0.34 | 0.34 | 0.42 | 0.70 | 0.0026  |
| <i>Desulfovibrio</i><br>(Proteobacteria/Deltaproteobacteria/Desulfovibrionales/Desulfovibrionaceae)      | 0.00 | 0.00 | 0.00 | 0.04 | 0.0032  |
| <i>Oxobacter</i><br>(Firmicutes/Clostridia/Clostridiales/Clostridiaceae)                                 | 0.02 | 0.02 | 0.01 | 0.04 | 0.0052  |
| <i>Streptococcus</i><br>(Firmicutes/Bacilli/Lactobacillales/Streptococcaceae)                            | 0.04 | 0.08 | 0.11 | 0.09 | 0.0054  |

**Table 3. Median values of food consumption per day for each of the four diet groups (DGs).**

| Food Names                                               | Food Groups          | DG1   | DG2   | DG3    | DG4    |
|----------------------------------------------------------|----------------------|-------|-------|--------|--------|
| White bread and rolls (including ciabatta & pannini)     | cereals and potatoes | 0.01  | 0.143 | 0.4285 | 0      |
| Brown bread and rolls                                    | cereals and potatoes | 0.143 | 0.286 | 0.0215 | 0      |
| Wholemeal bread and rolls                                | cereals and potatoes | 0.714 | 0.033 | 0      | 0      |
| Wheat-free; Rye bread; spelt bread (specify)             | cereals and potatoes | 0     | 0     | 0      | 0      |
| Cream crackers, cheese biscuits                          | cereals and potatoes | 0     | 0.01  | 0      | 0      |
| Crisp bread                                              | cereals and potatoes | 0     | 0     | 0      | 0      |
| Pancakes, muffins, oatcakes                              | cereals and potatoes | 0     | 0     | 0      | 0      |
| Scone (white)                                            | cereals and potatoes | 0.01  | 0.01  | 0.0215 | 0.005  |
| Scone (brown)                                            | cereals and potatoes | 0     | 0     | 0      | 0      |
| Non-ready to eat - Porridge                              | cereals and potatoes | 1     | 0.286 | 1      | 1      |
| High fibre (Bran/flakes, wheat biscuits, shredded wheat) | cereals and potatoes | 0     | 0     | 0      | 0      |
| Corn flakes, popped rice                                 | cereals and potatoes | 0     | 0     | 0      | 0      |
| Muesli                                                   | cereals and potatoes | 0     | 0     | 0      | 0      |
| Sugar-coated cereals                                     | cereals and potatoes | 0     | 0     | 0      | 0      |
| Boiled, instant or jacket potatoes                       | cereals and potatoes | 1     | 0.714 | 0      | 0      |
| Mashed potatoes                                          | cereals and potatoes | 0.033 | 0.286 | 1      | 1      |
| Chips / Roast potatoes                                   | cereals and potatoes | 0.033 | 0.033 | 0.033  | 0.005  |
| Potato Salad                                             | cereals and potatoes | 0.01  | 0.01  | 0      | 0      |
| White Rice                                               | cereals and potatoes | 0.01  | 0     | 0      | 0      |
| Brown Rice                                               | cereals and potatoes | 0.01  | 0     | 0      | 0      |
| White/yellow or green pastas (e.g. spaghetti, noodles)   | cereals and potatoes | 0.01  | 0     | 0      | 0      |
| Wholemeal pasta                                          | cereals and potatoes | 0     | 0     | 0      | 0      |
| Cream (tablespoon)                                       | dairy                | 0     | 0.01  | 0      | 0.2145 |
| Creme fraiche/soured cream                               | dairy                | 0     | 0     | 0      | 0      |
| Low-fat yoghurt                                          | dairy                | 0     | 0     | 0      | 0      |
| Full-fat yoghurt or Greek style yoghurt (125g carton)    | dairy                | 0     | 0.01  | 0      | 0.286  |
| Dairy desserts (125g carton)                             | dairy                | 0     | 0     | 0      | 0.005  |
| Cheddar cheese (medium serving)                          | dairy                | 0.143 | 0.143 | 0      | 0      |
| Low-fat cheddar cheese (medium serving)                  | dairy                | 0     | 0     | 0      | 0      |
| Cottage cheese                                           | dairy                | 0     | 0     | 0      | 0      |
| Eggs as boiled, fried, scrambled, poached (one)          | -                    | 0.286 | 0.286 | 0.143  | 0      |
| Butter                                                   | dairy                | 0     | 0     | 0      | 0.0715 |
| Lite Butter                                              | dairy                | 0     | 0     | 0      | 0      |
| Low-fat margarine                                        | -                    | 0     | 0     | 0      | 0      |
| Cholesterol Lowering margarine                           | -                    | 0     | 0     | 0      | 0      |
| Cream & Veg. Oil spread                                  | dairy                | 0     | 0     | 0      | 0      |
| Olive oil spread                                         | -                    | 0     | 0     | 0      | 0      |
| Meat or cream soups: homemade / fresh (1 bowl)           | -                    | 0     | 0.01  | 0      | 0      |
| Meat or cream soups: tinned / packet (1 bowl)            | -                    | 0     | 0     | 0      | 0      |
| Whole milk (cup) - cow, goat, soya, rice milk            | dairy                | 0     | 0     | 0.143  | 1      |
| Semi-skimmed milk (cup)                                  | dairy                | 0     | 0     | 0      | 0      |

|                                                                                      |                           |       |       |       |        |
|--------------------------------------------------------------------------------------|---------------------------|-------|-------|-------|--------|
| Probiotic Yoghurts / cheese / milk                                                   | dairy                     | 0.286 | 0     | 0     | 0      |
| Fish fried (batter/breadcrumbs), baked, grilled, fingers/cakes                       | fish                      | 0     | 0.01  | 0.088 | 0.143  |
| White fish, fresh or frozen (e.g. cod, haddock, plaice, sole)                        | fish                      | 0.143 | 0.143 | 0     | 0      |
| Oily fish, fresh or canned (e.g. mackerel, kippers, tuna, salmon, sardines, herring) | fish                      | 0.143 | 0.033 | 0     | 0      |
| Shellfish (e.g. crab, prawns, mussels)                                               | fish                      | 0     | 0     | 0     | 0      |
| Apples                                                                               | fruit                     | 0.286 | 0.143 | 0     | 0.2145 |
| Pears                                                                                | fruit                     | 0.143 | 0.033 | 0     | 0      |
| Oranges, satsumas, mandarins                                                         | fruit                     | 0.286 | 0.033 | 0     | 0      |
| Grapefruit                                                                           | fruit                     | 0     | 0     | 0     | 0      |
| Bananas                                                                              | fruit                     | 0.286 | 0.286 | 0.143 | 0.2145 |
| Grapes                                                                               | fruit                     | 0.143 | 0.01  | 0     | 0      |
| Melon                                                                                | fruit                     | 0.01  | 0     | 0     | 0      |
| Peaches, plums                                                                       | fruit                     | 0.01  | 0     | 0     | 0      |
| Apricots                                                                             | fruit                     | 0     | 0     | 0     | 0      |
| Strawberries, raspberries, kiwi fruit                                                | fruit                     | 0.143 | 0.01  | 0     | 0      |
| Blueberries                                                                          | fruit                     | 0     | 0     | 0     | 0      |
| Tinned fruit                                                                         | fruit                     | 0     | 0.01  | 0     | 0      |
| Dried fruit e.g. raisins                                                             | fruit                     | 0.01  | 0     | 0     | 0      |
| Frozen fruit                                                                         | fruit                     | 0     | 0     | 0     | 0      |
| Other fruit                                                                          | fruit                     | 0     | 0     | 0     | 0      |
| Pure fruit drinks e.g. orange juice (small glass)                                    | fruit                     | 0.033 | 0.033 | 0.286 | 1      |
| Fruit squash (small glass)                                                           | fruit                     | 0     | 0     | 0     | 0      |
| Beef (roast / steak)                                                                 | meat                      | 0.033 | 0.143 | 0.143 | 0.286  |
| Beef: stew                                                                           | meat                      | 0.033 | 0.143 | 0.143 | 0.143  |
| Beef burger (1 burger)                                                               | meat                      | 0     | 0     | 0     | 0      |
| Pork (roast / chops / escalopes)                                                     | meat                      | 0.01  | 0.033 | 0.143 | 0.143  |
| Lamb (roast / chops / stew)                                                          | meat                      | 0.033 | 0.143 | 0.143 | 0.143  |
| Chicken or other poultry e.g. turkey: roast                                          | meat                      | 0.143 | 0.143 | 0.286 | 0.286  |
| Breaded chicken, chicken nuggets, chicken burger                                     | meat                      | 0     | 0     | 0     | 0      |
| Bacon / Ham                                                                          | meat                      | 0.033 | 0.143 | 0.143 | 0.143  |
| Processed meat (Corned beef, Luncheon meats, sausages)                               | meat                      | 0     | 0.033 | 0.143 | 0.143  |
| Savoury pies (e.g. meat, pork, steak & kidney, sausage roll)                         | meat                      | 0     | 0     | 0     | 0      |
| Liver, heart, kidney, pâté                                                           | meat                      | 0     | 0     | 0     | 0      |
| Chocolate coated sweet biscuits e.g. digestive (one)                                 | sweets, cakes and alcohol | 0.143 | 0.033 | 0     | 0      |
| Plain biscuit e.g. digestives, rich tea (one)                                        | sweets, cakes and alcohol | 0.033 | 0.286 | 0.286 | 0.2145 |
| Cakes e.g. fruit, sponge                                                             | sweets, cakes and alcohol | 0.033 | 0.033 | 0.033 | 0      |
| Buns, pastries e.g. croissants, doughnuts                                            | sweets, cakes and alcohol | 0     | 0     | 0     | 0      |
| Fruit pies, tarts, crumbles                                                          | sweets, cakes and alcohol | 0.01  | 0.033 | 0.005 | 0      |
| Sponge puddings                                                                      | sweets, cakes and alcohol | 0     | 0     | 0     | 0.005  |
| Milk puddings e.g. rice, custard, trifle                                             | sweets, cakes and alcohol | 0.01  | 0.033 | 0.286 | 0.286  |
| Ice cream, choc ices, frozen desserts                                                | sweets, cakes and alcohol | 0.01  | 0.143 | 0.143 | 0.286  |
| Chocolates, singles or squares                                                       | sweets, cakes and alcohol | 0.033 | 0.033 | 0.005 | 0      |

|                                                      |                           |       |       |       |        |
|------------------------------------------------------|---------------------------|-------|-------|-------|--------|
| Sweets, toffees, mints                               | sweets, cakes and alcohol | 0.01  | 0.033 | 0     | 0      |
| Sugar added to tea coffee, cereals (teaspoons)       | sweets, cakes and alcohol | 0     | 0     | 0     | 3      |
| Sugar substitute e.g. canderel (teaspoon)            | sweets, cakes and alcohol | 0     | 0     | 0     | 0      |
| Crisps or other packet snacks                        | sweets, cakes and alcohol | 0     | 0     | 0     | 0      |
| Jam, marmalade, honey, syrup (teaspoon)              | sweets, cakes and alcohol | 1     | 1     | 0.5   | 0      |
| Wine (glass)                                         | sweets, cakes and alcohol | 0.143 | 0     | 0     | 0      |
| Beer, Larger or Cider (half pint)                    | sweets, cakes and alcohol | 0     | 0     | 0     | 0      |
| Low alcohol / alcohol free beer / larger (half pint) | sweets, cakes and alcohol | 0     | 0     | 0     | 0      |
| Port, Sherry, Vermouth, liqueurs (glass)             | sweets, cakes and alcohol | 0     | 0     | 0     | 0      |
| Spirits e.g. Gin, Whiskey (Single measure)           | sweets, cakes and alcohol | 0     | 0     | 0     | 0      |
| Low calorie or diet soft fizzy drink (glass)         | sweets, cakes and alcohol | 0     | 0     | 0     | 0.005  |
| Fizzy Soft drinks e.g. soda pop                      | sweets, cakes and alcohol | 0     | 0     | 0     | 0.2145 |
| Carrots                                              | vegetables                | 0.286 | 0.286 | 0.286 | 0.714  |
| Spinach                                              | vegetables                | 0.01  | 0     | 0     | 0      |
| Broccoli, spring greens, kale                        | vegetables                | 0.286 | 0.143 | 0     | 0      |
| Brussels sprouts                                     | vegetables                | 0.01  | 0.01  | 0.033 | 0.143  |
| Cabbage                                              | vegetables                | 0.033 | 0.143 | 0.143 | 0.143  |
| Peas                                                 | vegetables                | 0.033 | 0.143 | 0.143 | 0.286  |
| Green beans, broad beans, runner beans               | vegetables                | 0.01  | 0     | 0     | 0.143  |
| Courgettes                                           | vegetables                | 0.01  | 0     | 0     | 0      |
| Cauliflower                                          | vegetables                | 0.033 | 0.143 | 0.143 | 0.143  |
| Parsnips, turnips                                    | vegetables                | 0.143 | 0.143 | 0.143 | 0.143  |
| Leeks                                                | vegetables                | 0.033 | 0     | 0     | 0      |
| Onions                                               | vegetables                | 0.286 | 0.143 | 0     | 0      |
| Garlic                                               | vegetables                | 0.143 | 0     | 0     | 0      |
| Mushrooms                                            | vegetables                | 0.143 | 0.033 | 0     | 0      |
| Sweet peppers                                        | vegetables                | 0.143 | 0     | 0     | 0      |
| Green salad, lettuce                                 | vegetables                | 0.286 | 0.143 | 0     | 0      |
| Cucumber, celery                                     | vegetables                | 0.143 | 0.033 | 0     | 0      |
| Tomatoes                                             | Vegetables                | 0.286 | 0.286 | 0.088 | 0      |
| Sweet-corn                                           | Vegetables                | 0     | 0     | 0     | 0      |
| Beetroot                                             | Vegetables                | 0.033 | 0.01  | 0     | 0      |
| Coleslaw                                             | Vegetables                | 0.01  | 0.01  | 0     | 0      |
| Baked beans                                          | Vegetables                | 0.033 | 0.143 | 0     | 0      |
| Dried lentils, beans, peas                           | Vegetables                | 0     | 0     | 0     | 0      |
| Tofu, soya meat, TVP, vege-burger                    | -                         | 0     | 0     | 0     | 0      |
| Lasagne (meat based)                                 | -                         | 0.01  | 0     | 0     | 0      |
| Lasagne (vegetarian)                                 | -                         | 0     | 0     | 0     | 0      |
| Pizza                                                | -                         | 0.01  | 0     | 0     | 0      |
| Quiche (medium serving)                              | -                         | 0     | 0     | 0     | 0      |
| Light salad cream or light mayonnaise (tablespoon)   | -                         | 0.01  | 0     | 0     | 0      |
| Salad cream, mayonnaise (tablespoon)                 | -                         | 0     | 0     | 0     | 0      |
| French dressing (tablespoon)                         | -                         | 0.01  | 0     | 0     | 0      |
| Other salad dressing (tablespoon)                    | -                         | 0     | 0     | 0     | 0      |



|                                               |                     |       |       |       |       |
|-----------------------------------------------|---------------------|-------|-------|-------|-------|
| Sunflower margarine e.g. Flora                | -                   | 0     | 0     | 0     | 0     |
| Peanuts or other nuts                         | -                   | 0.01  | 0     | 0     | 0     |
| Vegetable soups: homemade/fresh (1 bowl)      | -                   | 0.033 | 0.143 | 0.286 | 0.286 |
| Vegetable soups: tinned/packet (1 bowl)       | -                   | 0     | 0     | 0     | 0     |
| Sauces e.g. white, cheese, gravy (tablespoon) | -                   | 0.033 | 0.286 | 1     | 1     |
| Tomato based sauces e.g. pasta sauces         | -                   | 0.01  | 0     | 0     | 0     |
| Curry-type sauces                             | -                   | 0.01  | 0     | 0     | 0     |
| Pickles, chutney (tablespoon)                 | -                   | 0.01  | 0     | 0     | 0     |
| Marmite, Bovril (tablespoon)                  | -                   | 0     | 0     | 0     | 0     |
| Peanut butter (teaspoon)                      | -                   | 0     | 0     | 0     | 0     |
| Tea (cup)                                     | Hot beverages       | 2     | 4     | 4     | 4     |
| Herbal tea (cup)                              | Hot beverages       | 0     | 0     | 0     | 0     |
| Coffee instant (cup)                          | Hot beverages       | 0.143 | 0.033 | 0     | 0     |
| Coffee ground (cup)                           | Hot beverages       | 0     | 0     | 0     | 0     |
| Coffee, decaffeinated (cup)                   | Hot beverages       | 0     | 0     | 0     | 0     |
| Coffee whitener e.g. Coffee-mate (teaspoon)   | -                   | 0     | 0     | 0     | 0     |
| Cocoa, Hot Chocolate (cup)                    | Hot beverages       | 0     | 0     | 0     | 0     |
| Horlicks, Ovaltine (cup)                      | Hot beverages       | 0     | 0     | 0     | 0     |
| Vitamin supplements (details)                 | vitamins / minerals | 0     | 0     | 0     | 0     |
| Mineral supplements (details)                 | vitamins / minerals | 0     | 0     | 0     | 0     |
| Other supplements                             | vitamins / minerals | 1     | 0     | 0     | 0     |
| Ready meal                                    | -                   | 0     | 0     | 0     | 0     |
| Takeaway                                      | -                   | 0     | 0     | 0     | 0     |

**Table 4 Assembly statistics for shotgun sequencing metagenomics.**

Of the 27 assemblies, 25 were based on libraries with 91 bp paired-end Illumina reads and 350 bp insert size. Samples EM039 and EM173 were assembled using 101 bp paired-end Illumina reads, from libraries with a 500 bp insert size, and in hybrid assembly with 551,726 and 665,164 454 Titanium reads, respectively. Only contigs larger than 500 bp were used for further analysis.

| <b>Sample</b>  | <b>Number of contigs</b> | <b>Total contig length (bp)</b> | <b>Largest contig (bp)</b> | <b>N50 (bp)</b> | <b>Total number of bases</b> |
|----------------|--------------------------|---------------------------------|----------------------------|-----------------|------------------------------|
| EM039          | 57,873                   | 102,436,267                     | 495,772                    | 2,873           | 3,317,557,338                |
| EM148          | 8,121                    | 56,447,615                      | 520,052                    | 30,601          | 4,795,110,722                |
| EM172          | 55,298                   | 83,738,852                      | 125,936                    | 2,050           | 4,472,602,022                |
| EM173          | 48,821                   | 108,101,567                     | 146,798                    | 4,013           | 3,130,777,799                |
| EM175          | 7,706                    | 56,078,081                      | 595,761                    | 30,216          | 4,772,905,202                |
| EM176          | 8,004                    | 64,792,202                      | 656,046                    | 36,029          | 4,780,810,982                |
| EM177          | 46,980                   | 121,070,988                     | 217,703                    | 5,683           | 4,776,788,162                |
| EM191          | 3,990                    | 49,084,620                      | 418,300                    | 59,730          | 4,789,620,542                |
| EM204          | 12,745                   | 79,505,409                      | 570,565                    | 44,252          | 4,779,024,662                |
| EM205          | 53,697                   | 135,486,275                     | 162,823                    | 5,242           | 4,786,831,622                |
| EM208          | 3,313                    | 41,992,026                      | 546,341                    | 64,999          | 4,790,740,682                |
| EM209          | 45,871                   | 116,311,093                     | 205,124                    | 5,017           | 4,788,571,862                |
| EM219          | 19,319                   | 85,434,733                      | 555,766                    | 14,559          | 4,796,211,602                |
| EM227          | 12,837                   | 54,647,530                      | 336,634                    | 26,765          | 4,794,620,762                |
| EM232          | 31,942                   | 121,533,960                     | 236,309                    | 10,432          | 4,794,202,982                |
| EM238          | 7,351                    | 39,150,291                      | 769,101                    | 48,224          | 4,793,427,362                |
| EM242          | 9,797                    | 60,568,098                      | 641,916                    | 35,719          | 4,796,499,242                |
| EM251          | 11,087                   | 65,526,982                      | 357,199                    | 21,319          | 4,786,586,462                |
| EM268          | 32,610                   | 97,409,224                      | 575,002                    | 8,616           | 4,789,756,442                |
| EM275          | 9,814                    | 59,736,375                      | 813,547                    | 24,504          | 4,796,447,222                |
| EM283          | 35,823                   | 110,290,277                     | 284,712                    | 7,512           | 4,788,078,482                |
| EM293          | 9,512                    | 57,120,941                      | 733,123                    | 53,850          | 4,795,731,362                |
| EM305          | 8,755                    | 59,052,708                      | 446,907                    | 34,979          | 4,793,440,322                |
| EM308          | 14,486                   | 80,827,555                      | 411,604                    | 21,742          | 4,794,984,362                |
| EM326          | 16,809                   | 82,168,325                      | 511,025                    | 37,604          | 4,795,947,722                |
| EM337          | 32,940                   | 84,242,311                      | 257,796                    | 5,093           | 4,798,092,962                |
| EM338          | 44,075                   | 125,050,275                     | 132,015                    | 7,202           | 4,793,679,182                |
| <b>Sum</b>     | <b>649,576</b>           | <b>2,197,804,580</b>            | <b>11,723,877</b>          | <b>NA</b>       | <b>125,889,048,067</b>       |
| <b>Average</b> | <b>24,058</b>            | <b>81,400,170</b>               | <b>434,218</b>             | <b>24,031</b>   | <b>4,662,557,336</b>         |

**Table 5 Number of sequence matches for genes encoding three SCFA-producing enzymes against 27 assembled metagenomes.**

BCoAt: Butyryl-CoA transferase / Acetyl-CoA hydrolase; ACS: Acetate-formyltetrahydrofolate synthetase/Formate-tetrahydrofolate ligase; PCoAt: Propionyl-CoA:succinate-CoA transferase / Propionate CoA-transferase. Columns titled Matching genes show number of TBLASTN hits of enzymes (BCoAt: GI|71081820|; ACS: GI|218353245| and GI|7242549|; PCoAt: GI|29346147| and GI|260588698|) with an amino acid identity greater than 30% and an alignment length longer than 200 bp.

| Subject                  | Location  | Predicted genes  | Matching BCoAt genes | Matching ACS genes | Matching PCoAt genes |
|--------------------------|-----------|------------------|----------------------|--------------------|----------------------|
| EM039                    | Community | 136,611          | 9                    | 13                 | 9                    |
| EM148                    | Rehab     | 52,810           | 10                   | 10                 | 7                    |
| EM172                    | Community | 150,449          | 14                   | 18                 | 11                   |
| EM173                    | Longstay  | 65,189           | 2                    | 6                  | 4                    |
| EM175                    | Community | 56,117           | 4                    | 11                 | 7                    |
| EM176                    | Community | 60,966           | 7                    | 12                 | 12                   |
| EM177                    | Community | 156,739          | 12                   | 18                 | 17                   |
| EM191                    | Longstay  | 43,959           | 1                    | 10                 | 11                   |
| EM204                    | Community | 78,779           | 8                    | 11                 | 10                   |
| EM205                    | Community | 183,002          | 11                   | 11                 | 13                   |
| EM208                    | Longstay  | 37,155           | 0                    | 9                  | 6                    |
| EM209                    | Rehab     | 158,301          | 16                   | 14                 | 16                   |
| EM219                    | Rehab     | 94,356           | 9                    | 13                 | 15                   |
| EM227                    | Longstay  | 57,754           | 3                    | 8                  | 8                    |
| EM232                    | Rehab     | 141,771          | 18                   | 14                 | 13                   |
| EM238                    | Longstay  | 38,639           | 3                    | 6                  | 5                    |
| EM242                    | Longstay  | 58,756           | 3                    | 9                  | 9                    |
| EM251                    | Community | 65,721           | 4                    | 10                 | 8                    |
| EM268                    | Community | 123,398          | 13                   | 15                 | 7                    |
| EM275                    | Longstay  | 59,297           | 8                    | 10                 | 8                    |
| EM283                    | Community | 137,351          | 13                   | 16                 | 9                    |
| EM293                    | Longstay  | 55,734           | 5                    | 8                  | 8                    |
| EM305                    | Rehab     | 57,727           | 6                    | 10                 | 8                    |
| EM308                    | Longstay  | 80,512           | 8                    | 11                 | 12                   |
| EM326                    | Rehab     | 85,907           | 8                    | 12                 | 8                    |
| EM337                    | Rehab     | 108,711          | 7                    | 13                 | 6                    |
| EM338                    | Rehab     | 161,152          | 13                   | 13                 | 15                   |
| <b>Community Total</b>   |           | <b>1,149,133</b> | <b>95</b>            | <b>135</b>         | <b>103</b>           |
| <b>Long-stay Total</b>   |           | <b>496,995</b>   | <b>33</b>            | <b>77</b>          | <b>71</b>            |
| <b>Community Average</b> |           | <b>114,913</b>   | <b>9.5</b>           | <b>13.5</b>        | <b>10.3</b>          |
| <b>Long-stay Average</b> |           | <b>55,222</b>    | <b>3.7</b>           | <b>8.6</b>         | <b>7.9</b>           |

**Table 6 Descriptive statistics of clinical and health measurements in 178 elderly subjects across the four residence locations.**

|                                           | <b>Community<br/>(n=83)</b>               | <b>Day Hospital<br/>(n=20)</b> | <b>Rehabilitation<br/>(n=15)</b> | <b>Long-stay<br/>(n=60)</b> |
|-------------------------------------------|-------------------------------------------|--------------------------------|----------------------------------|-----------------------------|
|                                           | <b>Mean (SD)</b>                          |                                |                                  |                             |
| <b>Age (yrs)</b>                          | 73.7 (6.5)                                | 80.9 (6.6)                     | 77.3 (6.9)                       | 83.7 (7.5)                  |
| <b>Male (%)</b>                           | 43                                        | 65                             | 53                               | 23                          |
| <b>Weight (kg)</b>                        | 75.5 (16.5)                               | 79.3 (17.3)                    | 82.6 (16.9)                      | 59.8 (13.3)                 |
| <b>BMI<sup>1</sup> (kg/m<sup>2</sup>)</b> | 27.5 (5)                                  | 28.6 (6.1)                     | 30.6 (4.9)                       | 23.5 (4.6)                  |
| <b>CC<sup>2</sup> (cm)</b>                | 36.2 (4.2)                                | 37.3 (5.8)                     | 36.3 (5.2)                       | 29.8 (4.5)                  |
| <b>SBP<sup>3</sup> (mmHg)</b>             | 140.6 (17.1)                              | 136.8 (17)                     | 122.3 (15)                       | 128 (18.8)                  |
| <b>DBP<sup>4</sup> (mmHg)</b>             | 76 (10.2)                                 | 71.5 (11.5)                    | 65.6 (9.6)                       | 70.9 (13)                   |
|                                           | <b>Median (lower and upper quartiles)</b> |                                |                                  |                             |
| <b>Barthel<sup>5</sup> (0, 20)</b>        | 20 (20, 20)                               | 20 (17.75, 20)                 | 12 (10, 16.5)                    | 2 (1, 6.75)                 |
| <b>FIM<sup>6</sup> (0, 126)</b>           | 126 (125, 126)                            | 124.5 (118.75, 126)            | 94 (82, 114)                     | 35.5 (20, 61.25)            |
| <b>MMSE<sup>7</sup> (0, 30)</b>           | 29 (27, 30)                               | 27 (25, 29)                    | 25 (21, 26.75)                   | 13.5 (1.5, 20)              |
| <b>MNA<sup>8</sup> (0, 30)</b>            | 26.5 (25.5, 28)                           | 24.75 (23.875, 26.625)         | 24.5 (22.75, 25.25)              | 17 (13.5, 21)               |
| <b>GDT<sup>9</sup> (0, 15)</b>            | 1 (0, 2)                                  | 2 (1, 7)                       | 4 (3, 4.25)                      | 1 (1, 3)                    |
| <b>CCI<sup>10</sup> (0, 9)</b>            | 0 (0, 1)                                  | 3 (2, 4)                       | 3 (1, 4)                         | 3 (1.5, 4)                  |

<sup>1</sup>Body Mass Index, <sup>2</sup>Calf Circumference, <sup>3</sup>Systolic Blood Pressure, <sup>4</sup>Diastolic Blood Pressure

<sup>5</sup>Barthel Index of Activities of Daily Living: Score out of a total of 20. Higher scores indicate higher degree of independence

<sup>6</sup>Functional Independence Measure: Score out of a total of 126. Higher scores indicate higher degree of independence.

<sup>7</sup>Mini-Mental State Exam: Score range 0 (worst performance) – 30 (best performance)

<sup>8</sup>Mini-Nutritional Assessment: Score out of a total of 30.  $\geq 24$  = well-nourished; 17-23.5 = at risk of malnourishment;  $<17$  = undernourished

<sup>9</sup>Geriatric Depression Test: Score out of 15, short version of the Geriatric Depression Rating Scale

<sup>10</sup>Charlson Index of Comorbidity: Score out of a total of 22. Higher scores indicate higher degree of comorbidity

**Table 8: Effect of medications on health measures tested for microbiota correlations**

Medication types are coded as per foot-note. The Associated Difference column shows the predicted median change in the health parameter measurement in subjects receiving the medication compared to those who did not, and is derived from the slope of the medication regression in the median regression model adjusted for age, gender, location (for all 178 subjects), unweighted UniFrac PCoA axes 1, 2 and 3, and any other medications that were added to the model for a specific health value. Asterisks indicate significant p-values: p <= 0.05 (\*), p <= 0.01 (\*\*), p <= 0.001 (\*\*\*)

| Unweighted UniFrac PCoA for all four residence locations (n = 178) |                 |                    |                       |           |
|--------------------------------------------------------------------|-----------------|--------------------|-----------------------|-----------|
| Health measurement                                                 | Medication type | Number of subjects | Associated difference | p-value   |
| GDT                                                                | Med L           | 28                 | -0.68                 | 0.2       |
|                                                                    | Med M           | 37                 | 1.2                   | 0.064     |
|                                                                    | Med P           | 10                 | 1.15                  | 0.13      |
| Diastolic BP                                                       | Med C           | 103                | 3.39                  | 0.053     |
|                                                                    | Med D           | 48                 | -1.19                 | 0.61      |
| IL6                                                                | Med Q           | 13                 | 3.06                  | 0.15      |
|                                                                    | Med R           | 56                 | 1.58                  | 0.18      |
|                                                                    | Med S           | 10                 | 1.54                  | 0.32      |
|                                                                    | Med T           | 9                  | 4.53                  | 0.18      |
| IL8                                                                | Med Q           | 13                 | 6.61                  | 0.19      |
|                                                                    | Med R           | 56                 | -4.28                 | 0.24      |
|                                                                    | Med S           | 10                 | -3.28                 | 0.6       |
|                                                                    | Med T           | 9                  | 0.87                  | 0.87      |
| TNFα                                                               | Med Q           | 13                 | -0.24                 | 0.75      |
|                                                                    | Med R           | 56                 | 0.51                  | 0.40      |
|                                                                    | Med S           | 10                 | 2.88                  | 0.1       |
|                                                                    | Med T           | 9                  | 0.28                  | 0.71      |
| Unweighted UniFrac PCoA for Community-only subjects (n = 83)       |                 |                    |                       |           |
| Health measurement                                                 | Medication type | Number of subjects | Associated difference | p-value   |
| Diastolic BP                                                       | Med C           | 44                 | 2.3                   | 0.44      |
|                                                                    | Med D           | 15                 | -3.51                 | 0.48      |
| GDT                                                                | Med L           | 5                  | -1.25                 | 0.12      |
|                                                                    | Med M           | 7                  | 2.89                  | 0.012*    |
| Unweighted UniFrac PCoA for Longstay-only subjects (n = 60)        |                 |                    |                       |           |
| Health measurement                                                 | Medication type | Number of subjects | Associated difference | p-value   |
| Barthel                                                            | Med C           | 29                 | -1.03                 | 0.31      |
|                                                                    | Med D           | 13                 | 2.15                  | 0.21      |
|                                                                    | Med I           | 9                  | -0.95                 | 0.55      |
|                                                                    | Med L           | 23                 | -1.48                 | 0.15      |
|                                                                    | Med N           | 15                 | -1.2                  | 0.38      |
|                                                                    | Med O           | 7                  | 1.54                  | 0.46      |
|                                                                    | Med Q           | 10                 | -4.74                 | 0.009**   |
|                                                                    | Med R           | 44                 | 1.05                  | 0.41      |
|                                                                    | Med S           | 4                  | 6.41                  | 0.001**   |
|                                                                    | Med T           | 6                  | -1.96                 | 0.33      |
| FIM                                                                | Med C           | 29                 | -7.45                 | 0.17      |
|                                                                    | Med D           | 13                 | 15.01                 | 0.15      |
|                                                                    | Med I           | 9                  | -10.89                | 0.29      |
|                                                                    | Med L           | 23                 | -2.28                 | 0.71      |
|                                                                    | Med N           | 15                 | -5.86                 | 0.49      |
|                                                                    | Med O           | 7                  | 15.79                 | 0.11      |
|                                                                    | Med Q           | 10                 | -17.6                 | 0.062     |
|                                                                    | Med R           | 44                 | -1.08                 | 0.91      |
|                                                                    | Med S           | 4                  | 47.9                  | 0.0004*** |
|                                                                    | Med T           | 6                  | -14.98                | 0.21      |
| Diastolic BP                                                       | Med C           | 29                 | 0.52                  | 0.84      |
|                                                                    | Med D           | 13                 | -5.18                 | 0.17      |
| Systolic BP                                                        | Med C           | 29                 | -4.6                  | 0.33      |
|                                                                    | Med D           | 13                 | -7.42                 | 0.34      |
| IL8                                                                | Med Q           | 9                  | -2.56                 | 0.71      |
|                                                                    | Med R           | 40                 | -3.46                 | 0.48      |
|                                                                    | Med S           | 4                  | -1.66                 | 0.84      |
|                                                                    | Med T           | 4                  | -1.78                 | 0.79      |
| CRP                                                                | Med T           | 4                  | 1.05                  | 0.78      |

Med C = Cardiovascular Medications (Chronic Cardiac Failure / Angina / Hypertension)  
 Med D = Diuretics                      Med I = Bronchodilators / Inhalers medications  
 Med K = Arthritis (osteo and rheumatoid) medications    Med L = Insomnia medications  
 Med M = Mood Disorders (antidepressants / psychoses / anxiety) medications  
 Med N = Epilepsy / Seizures / Neuropathic Analgesia medications  
 Med O = Parkinsons medications    Med P = Alzheimers / dementia medications  
 Med Q = Analgesia - Opiod medications    Med R = Analgesia (Non - opioid) - medications  
 Med S = NSAIDs (non-steroidal anti-inflammatory drug)    Med T = Steroids

**Table 9: Chemical shifts of metabolites identified by NMR metabolomics.**

|    | <b>Metabolite</b>      | <b>Chemical shift (multiplicity) and assignment</b>                                        |
|----|------------------------|--------------------------------------------------------------------------------------------|
| 1  | Cholate                | 0.73 ppm (s) CH <sub>3</sub>                                                               |
| 2  | Caprylate              | 0.86 ppm (t) CH <sub>3</sub> , 1.28 ppm (m) CH <sub>2</sub>                                |
| 3  | Valerate               | 0.88 ppm (t) CH <sub>3</sub> , 1.27 ppm (m) CH <sub>2</sub> , 1.51 ppm CH <sub>2</sub>     |
| 4  | Butyrate <sup>a</sup>  | 0.90 ppm (t) CH <sub>3</sub> , 1.56 ppm (m) CH <sub>2</sub> , 2.16 ppm (t) CH <sub>2</sub> |
| 5  | Isovalerate            | 0.91 ppm (d) CH <sub>3</sub> , 2.06 ppm (d) CH <sub>2</sub>                                |
| 6  | Valine                 | 0.99 ppm (d) CH <sub>3</sub> , 1.04 ppm (d) CH <sub>3</sub>                                |
| 7  | Leucine                | 0.95 ppm (t) CH <sub>3</sub>                                                               |
| 8  | Isoleucine             | 0.94 ppm (t) CH <sub>3</sub> , 1.01 ppm (d) CH <sub>3</sub>                                |
| 9  | Propionate             | 1.06 ppm (t) CH <sub>3</sub> , 2.18 ppm (q) CH <sub>2</sub>                                |
| 10 | Threonine              | 1.32 ppm (d) CH <sub>3</sub> , 3.59 ppm (d) CH                                             |
| 11 | Lactate                | 1.34 ppm (d) CH <sub>3</sub>                                                               |
| 12 | Isocaproate            | 0.88 ppm (d) CH <sub>3</sub> , 1.44 ppm (m) CH                                             |
| 13 | Alanine                | 1.48 ppm (d) CH <sub>3</sub>                                                               |
| 14 | Lysine                 | 1.72 ppm (m) CH <sub>2</sub> , 3.02 ppm (t) CH <sub>2</sub>                                |
| 15 | Acetate                | 1.92 ppm (s) CH <sub>3</sub>                                                               |
| 16 | Glutamate              | 2.34 ppm (m) CH <sub>2</sub> , 2.05 ppm (m) CH <sub>2</sub>                                |
| 17 | Succinate              | 2.39 ppm (s) CH <sub>2</sub>                                                               |
| 18 | Glutamine              | 2.46 ppm (m) CH <sub>2</sub> , 2.11 (m) CH <sub>2</sub>                                    |
| 19 | Methylamine            | 2.60 ppm (s) CH <sub>3</sub>                                                               |
| 20 | Aspartate              | 2.66 ppm (m) CH <sub>2</sub> , 2.82 ppm (m) CH <sub>2</sub>                                |
| 21 | Trimethylamine         | 2.88 ppm (s) CH <sub>3</sub>                                                               |
| 22 | Malonate               | 3.11 ppm (s) CH <sub>2</sub>                                                               |
| 23 | Taurine                | 3.23 ppm (t) CH <sub>2</sub> , 3.36 ppm (t) CH <sub>2</sub>                                |
| 24 | Glycine <sup>d</sup>   | 3.55 ppm (s) CH <sub>2</sub>                                                               |
| 25 | Glucose <sup>b</sup>   | 3.25 ppm (dd) CH, 3.90 ppm (dd) CH <sub>2</sub> , 4.63 ppm (d) CH                          |
| 26 | Glutarate <sup>a</sup> | 1.79 ppm (m) CH <sub>2</sub>                                                               |
| 27 | Lipid <sup>b</sup>     | 1.17 ppm                                                                                   |
| 28 | Acetone                | 2.23 ppm (s) CH <sub>3</sub>                                                               |
| 29 | Phenylacetate          | 3.54 ppm (s) CH <sub>3</sub> , 7.28 ppm (m) CH, 7.37 ppm (m) CH                            |
| 30 | Tyrosine               | 6.89 ppm (m) CH, 7.19 ppm (m) CH                                                           |
| 31 | Phenylalanine          | CH, 7.33 ppm (m) CH, 7.37 ppm (m) CH, 7.43 ppm (m) CH                                      |
| 32 | Formate                | 8.46 ppm (s) CH <sub>2</sub>                                                               |

<sup>a</sup>higher in faecal water of community subjects relative to long stay subjects

<sup>b</sup>higher in faecal water of long stay subjects relative to community subjects

Letters in brackets indicate the multiplicity of the peak. s, singlet; d, doublet; dd, doublet of doublets; t, triplet; q, quartet; m, multiplet.

## **Supplementary Notes**

### **Microbiota-metabolome co-inertia analysis**

To aid interpretation of the relationship between the genus-level microbiota and metabolomics datasets, we integrated them using a multivariate method known as co-inertia analysis (CIA<sup>57</sup>). Principal components analysis (PCA) can be applied to each of the individual datasets, and these PCAs are used as inputs for the CIA which then identifies ordinations of the two datasets that are maximally co-variant and so identifies the shared biological trends within the two datasets. The method is an unsupervised approach and is insensitive to a high variable-to-sample ratio<sup>58</sup>.

CIA was applied to the genus-level microbiota composition and metabolome data (Supplementary Figure 6). As noted in Main text, this analysis revealed a significant relationship between the two datasets with an RV coefficient of 0.474, indicating a strong co-structure between the two datasets. The first two components of the CIA account for 58.9% of the variance in the datasets, with component 1 (horizontal) accounting for 48.4% of the variance, and the second, component 2 (vertical) accounting for another 10.5%. Community and long-stay samples are separated from each other along the primary axis in the analysis.

Using a cut-off of 1% abundance, the main genera associated with the community metabolome along the first axis were *Bacteroides*, *Faecalibacterium*, *Ruminococcus*, *Oscillibacter*, *Coprococcus* and *Sporobacter*. *Bacteroides* spp are known to produce acetate<sup>59</sup> but are found to be associated with diets rich in animal produces and low in fruit and veg in this and other studies<sup>60</sup>. This and their lack of cellulolytic ability<sup>61</sup> may explain the strong association with acetate along the first axis but the minor inverse association with the second axis. Instead *Sporobacter* is the genus most closely related to the production of acetate according to this analysis. When the reads mapping to this genus were investigated, we found that over 70% could be confidently assigned to the species *Sporobacter termitidis*. *Sporobacter termitidis* is known to produce only acetate as an end fermentation product<sup>62</sup>.

A number of genera are associated with the higher faecal levels of butyrate - *Faecalibacterium*, *Ruminococcus*, *Oscillibacter* and *Coprococcus*. The identified species that have the

highest correlation and abundance with these genera are *Faecalibacterium prausnitzii*, *Ruminococcus bromii*, *Coprococcus eutactus* and *Oscillibacter valericigenes*. *Oscillibacter valericigenes* is known to produce valerate<sup>63</sup> and so *Oscillibacter* may be the source of this SCFA in the analysis.

### Properties of bacterial co-abundance groups (CAGs).

Associations between individual genera were determined using the Kendall correlation coefficient. The full set of associations was visualized and clustered in R using the Made4 package<sup>64</sup> and the function *Heatplot*, whereby Hierarchical clustering with the Pearson correlation distance metric and Ward clustering was used to define co-abundant groups of genera (Supplementary Fig 12A). All significant positive associations are shown in Supplementary Fig 12B. These associations were controlled for multiple testing using the qvalue method<sup>55</sup> and only those with false discovery rate < 0.05 were retained (Supplementary Table 8).

The Kendall correlations were converted to a correlation distance metric and used as input for a Permutational MANOVA to determine if the CAGs were significantly different from each other. Essentially this compared strength of the correlations between the groups to correlation strengths within the groups in a pairwise manner. Permutational MANOVA<sup>65</sup> was performed using the *vegan* package in R. All five external CAGs displayed significantly different inter-relationships from each other ( $p < 0.0001$ ), except for the relationship between the *Bacteroides* CAG and the middle *Odoribacter* CAG which was the least distinct, with a significance of 0.052. The *Bacteroides* CAG has the smallest number of significant positive correlations between its members, giving it a weak coherence, and is defined more by significant negative correlations with the other four external CAGs but not against the middle *Odoribacter* group. Therefore the *Bacteroides* CAG was strongly negatively associated with the other CAGs but not with the middle group.

The major genera that dominate the CAGs are characterized by their genus-associated abilities to produce a wide range of short-chain fatty acids, including butyrate, acetate, lactate, propionate, formate, and succinate as well as ethanol, hydrogen, and carbon dioxide. However, the *Oscillibacter* CAG shows a large proportion of genera able to produce acetate, and only the acidaminococci are reported to produce butyrate<sup>66</sup>. The other CAGs also contain genera known to produce acetate, but



many of these fermentative genera are also able to synthesize a wider range of SCFAs when compared to the genera in the *Oscillibacter* CAG.

Genera able to use the fermentation products include *Desulfovibrio* and *Methanobrevibacter* which are able to use lactate or ethanol as electron donors and acetate as a carbon source respectively. The *Desulfovibrio* may also be using the sulphate liberated by the *Akkermansia* species from mucin, as an electron acceptor.

### **Description of Dietary Groups (DGs)**

DG1: The predominant features of this diet type include consumption of complex carbohydrates (including wholegrain breakfast cereals, breads, boiled potato), daily consumption of a wide range of fruit and vegetables and moderate (5 times/week) consumption of protein-rich white meat, fish and eggs. Red-meat was consumed in moderation by this group while oily fish were consumed once per week with low intakes of dairy produce (approx. 3 times/week) and high-sugar/low-nutrient dense foods.

DG2: Both complex (wholegrain breakfast cereals and breads, boiled potatoes) and simple carbohydrates (white bread) were consumed frequently in this diet type. A lower variety of fruit and vegetables were consumed, less frequently (two-three times/daily) compared to DG1. Red-meat, fish or eggs were consumed daily with reduced consumption of oily fish. Intakes of dairy produce were lower among this group (approx. once weekly) with higher intakes of high-sugar/low-nutrient dense foods compared to diet type 1.

DG3: Overall, this diet group contained the least variety of all the DG's. Porridge and mashed potato were the main daily staples while simple carbohydrate (white bread) was consumed frequently with little inclusion of wholemeal varieties. Consumption and variety of fruit and vegetables were lowest overall among this group (approx. 1-2 portions daily). Processed and unprocessed meat and eggs were consumed once or twice a day with little fish consumed. Intakes of dairy produce were low (once a week) with the lowest consumption of high-sugar/low-nutrient dense foods.

DG4: Similar to diet type 3, mashed potato and porridge were the only staples in this diet type and were consumed daily. Fruit and vegetable consumption was comparable with that of diet group 1 but

with much less variety. Processed and unprocessed meat were consumed daily and fried fish were consumed once a week. There was no consumption of fresh fish by these subjects. Dairy products and high-sugar/low-nutrient dense foods were consumed frequently by this cohort (once-twice and 3-4 times daily, respectively), predominantly full-fat dairy produce and puddings, and sweetened hot beverages which were consumed 1-3 times daily.

### **Analysis of possible confounders of microbiota-health associations**

**Antibiotics.** None of the subjects had been treated with antibiotics in the month prior to sampling; extending this exclusion window would impact negatively on recruitment rates of older subjects. To examine the effect of treatment prior to this exclusion window, we used quantile (median) regression to examine the association between microbiota alpha diversity and time in days since last antibiotic usage, extending before the one-month recruitment exclusion window. We also tested correlations between the (microbiota) PCoA axes and time since last antibiotic usage. These models were adjusted for age, gender and location, (as for the main microbiota-health analysis for Table 1). No relationship between microbiota diversity and time since last antibiotic treatment was established (data not shown).

**Other medications.** We adjusted median regression models for the effect of medications on cognate health read-outs. The actual effects of medication on relevant clinical scores in that model are presented in Supplementary Table 8. The majority of medications had small non-significant effects on the relevant health measure, which did not affect the significance of the relationship between the health variables and the microbiota presented in Table 1.

**Diet.** Although diet clearly impacts on microbiota; the composition of the diet was expected have a direct health effect independent of the observed diet-microbiota-health effects. To explore this issue, we repeated the median regression analysis, controlling for diet, using the Health Food Diversity (HFD) index. Although diet explained a number of the associations, the majority of the frailty indicators-microbiota associations reported in Table 1 were still significant. Two variables, weight and BMI no longer had significant associations with microbiota after adjustment for HFD.

### **Aggregate microbiota composition in the elderly**

We previously showed that there was a higher *Firmicutes/Bacteroidetes* ratio among nine younger subjects compared to 118 elderly subjects<sup>8</sup>. When we analysed 178 additional faecal samples from elderly subjects, and four additional samples from younger healthy individuals, we did not observe an aggregate microbiota dominated by phylum *Bacteroidetes* (Suppl. Fig 15). At genus level there were significantly higher levels of *Ruminococcus* and *Blautia* and lower levels of *Escherichia/Shigella* in young controls compared to the microbiota of the elderly subjects (Suppl. Fig 16). Clearly the balance in a study population of individuals from the *Bacteroidetes-Prevotella-Ruminococcus*-dominated groups (see main text) will affect aggregate estimations. To adequately infer microbiota differences between young and old populations a larger number of samples from the former cohort are needed, including information about food frequency consumption, which affects phylum proportions (ref.<sup>21</sup>; this study).

#### **Denoised versus Un-denoised pyrosequencing analysis**

Initially we denoised the pyrosequencing sequences using Denoiser<sup>67</sup> as part of the OTU picking approach according to recommendations from the QIIME documentation. We detected a run-specific bias in the denoised dataset when comparing OTU clustering of OTUs generated with and without a denoising step. Since OTUs were picked separately for each run at flow-gram level, prior to an overall OTU picking at sequence level, an over-clustering within each run seemed to have taken place. This happened in spite of using the recommended “exact” options for the UClust OTU picker. Suppl. Fig. 17 shows the run-specific bias and also how the clustering according to community location is retained for both denoised and un-denoised data sets.

**Supplementary References**

- 56 Nyamundanda, G., Brennan, L. & Gormley, I. C. Probabilistic principal component analysis for metabolomic data. *BMC Bioinformatics* **11**, 571, (2010).
- 57 Fagan, A., Culhane, A. C. & Higgins, D. G. A multivariate analysis approach to the integration of proteomic and gene expression data. *Proteomics* **7**, 2162-2171, (2007).
- 58 Jeffery, I. B. *et al.* Integrating transcription factor binding site information with gene expression datasets. *Bioinformatics* **23**, 298-305, (2007).
- 59 Macfarlane, S. & Macfarlane, G. T. Composition and metabolic activities of bacterial biofilms colonizing food residues in the human gut. *Appl. Environ. Microbiol.* **72**, 6204-6211, (2006).
- 60 Wu, G. D. *et al.* Linking long-term dietary patterns with gut microbial enterotypes. *Science* **334**, 105-108, (2011).
- 61 Flint, H. J., Scott, K. P., Duncan, S. H., Louis, P. & Forano, E. Microbial degradation of complex carbohydrates in the gut. *Gut Microbes* **3**, 1-18, (2012).
- 62 Fardeau, M.-L. *et al.* Isolation and characterization of *Sporobacter termitidis* gen. nov., sp. nov. from the digestive tract of the wood-feeding termite *Nasutitermes lujae*. *Int. J. Syst. Bacteriol.* **46** 512-517, (1996).
- 63 Iino, T., Mori, K., Tanaka, K., Suzuki, K. & Harayama, S. *Oscillibacter valericigenes* gen. nov., sp. nov., a valerate-producing anaerobic bacterium isolated from the alimentary canal of a Japanese corbicula clam. *Int. J. Syst. Evol. Microbiol.* **57**, 1840-1845, (2007).
- 64 Culhane, A. C., Thioulouse, J., Perriere, G. & Higgins, D. G. MADE4: an R package for multivariate analysis of gene expression data. *Bioinformatics* **21**, 2789-2790, (2005).
- 65 Anderson, M. J. A new method for non-parametric multivariate analysis of variance. *Austral. Ecology* **26**, 32-46, (2001).
- 66 Jumas-Bilak, E. *et al.* *Acidaminococcus intestini* sp. nov., isolated from human clinical samples. *Int. J. Syst. Evol. Microbiol.* **57**, 2314-2319, (2007).
- 67 Reeder, J. & Knight, R. The 'rare biosphere': a reality check. *Nat. Methods* **6**, 636-637, (2009).
